# Supplementary material for: Economic impacts of overweight and obesity: current and future estimates for 161 countries
Source: HighWire-hosted journal article supplement (doi:10.1136/bmjgh-2022-009773), 2022-09-01

## **Economic impacts of overweight and obesity: current and future estimates for 161 countries – Supplementary materials**

Adeyemi Okunogbe\*  
Global Health Division  
RTI International  
701 13th Street NW, Suite 750  
Washington, DC 20005  
aokunogbe@rti.org

Rachel Nugent  
Center for Global Noncommunicable Diseases  
RTI International  
Research Triangle Park, North Carolina, USA

Garrison Spencer  
Center for Global Noncommunicable Diseases  
RTI International  
Research Triangle Park, North Carolina, USA

Jaynaide Powis  
World Obesity Federation  
107-111 Fleet Street, Unit 406  
London, EC4A 2AB, United Kingdom

Johanna Ralston  
World Obesity Federation  
107-111 Fleet Street, Unit 406  
London, EC4A 2AB, United Kingdom

John Wilding  
World Obesity Federation  
107-111 Fleet Street, Unit 406  
London, EC4A 2AB, United Kingdom

\*Corresponding Author

Table of Contents

Appendix 1: Methods .....3

    Introduction .....3

    Estimating current impact of overweight and obesity .....3

        Direct costs .....4

        Indirect costs .....6

    Estimating future impacts of overweight and obesity .....10

    Currency conversions .....14

    References .....16

Appendix 2: Additional Tables.....20

Appendix 3: Systematic literature review for absenteeism, presenteeism, hospitalization, and outpatient visits .....34

## Appendix 1: Methods

### Introduction

We assess the economic impacts of overweight and obesity (OAO) for children and adults in 161 countries. This is an expansion of our earlier work that estimated the economic impact of overweight and obesity in eight countries.[1] Overweight is defined as a body mass index (BMI) of 25 kg/m<sup>2</sup> to 29.9 kg/m<sup>2</sup> in adults and obesity as BMI of 30 kg/m<sup>2</sup> and above. For children overweight is defined as weight that is one to two standard deviations above the median and obesity as more than two standard deviations above the median.[2]. We included 28 OAO-related diseases in this study (Table 1). These are the 28 diseases identified in the Global Burden of Disease (GBD) database for which evidence of their high BMI risk linkages were graded as being convincing or probable (based on the World Cancer Research Fund [WCRF] grades of convincing, probable, possible, or insufficient evidence).[3]

Table 1: Obesity (High BMI) attributable diseases in Global Burden of Disease study (GBD)

| Cause                                       | Cause Group                  |
|---------------------------------------------|------------------------------|
| 1. Esophageal cancer                        | Neoplasms                    |
| 2. Liver cancer                             | Neoplasms                    |
| 3. Breast cancer                            | Neoplasms                    |
| 4. Uterine cancer                           | Neoplasms                    |
| 5. Colon and rectum cancer                  | Neoplasms                    |
| 6. Gallbladder and biliary tract cancer     | Neoplasms                    |
| 7. Pancreatic cancer                        | Neoplasms                    |
| 8. Ovarian cancer                           | Neoplasms                    |
| 9. Kidney cancer                            | Neoplasms                    |
| 10. Thyroid cancer                          | Neoplasms                    |
| 11. Non-Hodgkin lymphoma                    | Neoplasms                    |
| 12. Multiple myeloma                        | Neoplasms                    |
| 13. Leukemia                                | Neoplasms                    |
| 14. Ischemic heart disease                  | Cardiovascular diseases      |
| 15. Ischemic stroke                         | Cardiovascular diseases      |
| 16. Intracerebral hemorrhage                | Cardiovascular diseases      |
| 17. Subarachnoid hemorrhage                 | Cardiovascular diseases      |
| 18. Hypertensive heart disease              | Cardiovascular diseases      |
| 19. Atrial fibrillation and flutter         | Cardiovascular diseases      |
| 20. Asthma                                  | Chronic Respiratory diseases |
| 21. Gallbladder and biliary diseases        | Digestive Diseases           |
| 22. Alzheimer's disease and other dementias | Neurological disorders       |
| 23. Chronic kidney disease                  | Chronic kidney disease       |
| 24. Osteoarthritis                          | Musculoskeletal disorders    |
| 25. Low back pain                           | Musculoskeletal disorders    |
| 26. Gout                                    | Musculoskeletal disorders    |
| 27. Cataract                                | Sense organ diseases         |
| 28. Diabetes mellitus type 2                | Endocrine diseases           |

We employed a cost-of-illness approach to estimate the economic impacts of overweight and obesity (both direct and indirect costs) from a societal perspective. This approach translates the adverse effect of overweight and obesity into monetary terms.[4] The estimates are useful for understanding the impact of overweight and obesity for policy prioritization and agenda setting. In addition, they are useful for facilitating cross-national comparisons of overweight and obesity consequence across different contexts[5]. The time horizon of the analysis includes current costs in the index year (2019) as well as projections to 2060 (Table 2). Model parameters and values were sourced from publicly available global databases and peer reviewed literature (see Table 1 in main manuscript). We aggregated the economic costs by country income group using the World Bank's fiscal year 2021 classifications and by WHO regions (see Appendix 3 Table 2). Detailed steps for estimations are explained in the following sections.

### Estimating current impact of overweight and obesity

The total economic cost of overweight and obesity is the sum of direct and indirect costs attributable to overweight and obesity.

$$\text{Total Economic Cost} = \text{Direct Costs} + \text{Indirect Costs}$$

**Direct costs**

These refer to the total healthcare expenditures resulting from treating OAO-related diseases. This includes medical resources used in treating these conditions (direct medical costs) as well as non-medical resources that are expended while seeking treatment (direct non-medical costs). It is noted that many countries with low spending on health provide limited care for many of the OAO-related diseases we are measuring. This leads to an underestimation of the total economic impact of overweight and obesity in those countries.

**Direct medical costs (DMC): Cost of medical resources to treat illness**

Direct medical costs are the cost of health care goods and services consumed for personal health care due to overweight and obesity and includes curative care, rehabilitative care, preventative care, ancillary services and medical goods.[6] The commonly used methodologies for quantifying these costs are the top-down approach and the bottom-up approach. In principle, the top-down approach estimates DMC by multiplying cost of treating OAO-attributable illnesses – typically derived from aggregate data – with an OAO-attributable fraction or ratio.[7] A commonly used parameter is the population attributable fraction (PAF) or population attributable risk (PAR). This is used to quantify how much a risk factor (in this case overweight and obesity) contributes to a disease or death. It can be defined as the reduction in disease or mortality that would occur at the population level if exposure to a risk factor is reduced to an alternative ideal exposure scenario (e.g. if no one experiences overweight and obesity).[8]

Alternatively, the bottom-up approach estimates the resources used per individual and extrapolates the per-capita costs to the population with overweight and obesity. Included costs are drugs, hospitalization, physician costs, inpatient and outpatient costs, etc.[7] Estimation of resources used per individual can be done through econometric modelling. This approach requires having nationally representative individual-level medical expenditure and anthropometric data. Due to the data constraints in many LMICs, this approach is impractical for the scope of this project.

We estimate DMC in this study by employing a hybrid of a top-down and bottom-up approach; using OAO-attributable fraction (OAF) for costs that were calculated using a bottom-up approach. The OAF is the proportion of total health expenditure that can be attributed to overweight and obesity. This represents the cost of health care goods and services for personal health care and includes curative care, rehabilitative care, preventative care, ancillary services and medical goods.[6] This proportion is then applied to national health expenditure data to calculate OAO-related medical costs.

$$DMC = OAF \times \text{Total Healthcare Expenditures}$$

Aggregate data on total health expenditure is available for most countries from the WHO Global Health Expenditure Database. To estimate the direct medical cost or OAO-attributable healthcare expenditures, we identified studies from our literature search that reported the proportion of health expenditure attributable to overweight and obesity or OAO-attributable fractions (OAF) for a country. We found the OAFs from the OECD report (for the 52 countries in the report) to be the most appropriate because they are based on the Global Burden of Disease study and include the same number of OAO-related diseases as this paper (Appendix 1: Table 1)[6]. The reported OAFs from the OECD report are the health expenditure associated with overweight and obesity as a percentage of total health expenditure and were presented as an average between 2020-2050.

**Deriving OAO-attributable fraction (OAF)**

To estimate OAF for countries not included in the OECD report and for projections, we regressed the available OAFs of the 52 countries from the OECD report on each country's average overweight and obesity prevalence between 2020 and 2050. The coefficient  $\beta$  is estimated with a simple linear regression of OAF on overweight and obesity prevalence following the approach used by Goodchild and colleagues for tobacco attributable fractions.[9]

$$OAF_i = \beta * Prev_i + \epsilon$$

The data does not violate assumptions of normality required for simple linear regression as demonstrated by the QQ plot below (Figure 1). The residuals of the regression (except the few outliers) do fall along a straight line at a 45 degree angle for the most part. The results of statistical tests for normality such as the Shapiro-wilk test ( $W=0.980$ ,

$p=0.508$ ), Shapiro-Francia test ( $W'=0.981$ ,  $p=0.471$ ) and Skewness/Kurtosis test [ $\text{Pr}[\text{Skewness}] = 0.189$ ,  $\text{Pr}[\text{Kurtosis}]=0.7612$ ],  $p=0.3860$ ] indicate we cannot reject the null hypothesis that OAF is normally distributed.

**Figure 1: Quantile-quantile (QQ) plot of residuals**

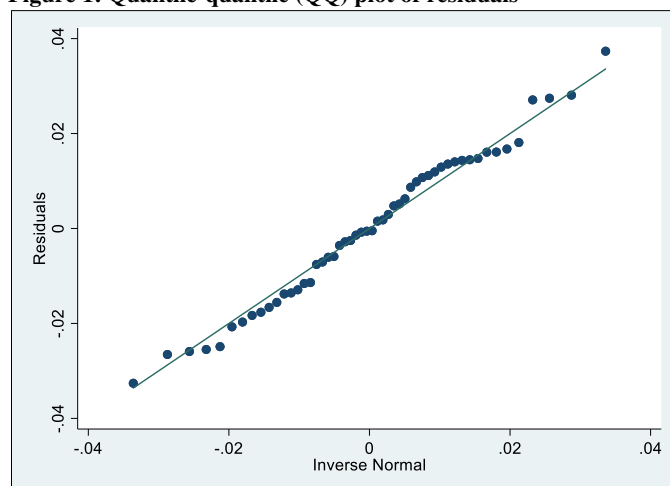

There is a significant positive association between OAF and OAO-prevalence ( $\beta=0.121$ ,  $F=21.74$ ,  $p<0.001$ ) (Figure 2). We opted to run the regression through the origin as the constant term was statistically insignificant. The two models are also not significantly different from each other ( $p=0.948$ ). The regression coefficient (0.1268395) from the estimated equation and the total overweight and obesity prevalence was used to estimate the OAF for all countries.[6,10] We also apply the regression outputs to projected overweight and obesity prevalence till 2060 to calculate future OAFs. While the OAFs from the OECD study may not be representative for all income groups, these countries account for the majority (about 95%) of global health expenditure based on the 2018 WHO Global Health Expenditure Database. To ensure consistency, we used the estimated OAFs from the regression outputs in computing direct medical costs in 2019 for all countries including the 52 countries in the OECD study.

**Figure 2: Plot of OAF and OAO-prevalence**

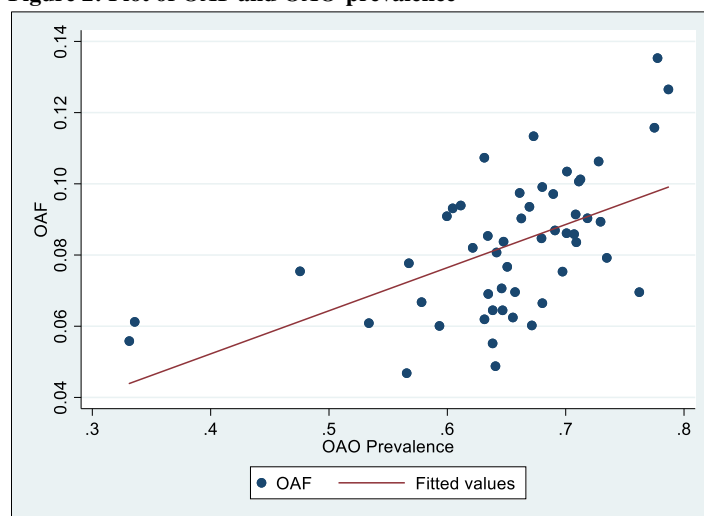

**Direct non-medical costs: Cost of non-medical resources to treat illness**

Direct non-medical costs measure the additional cost incurred during the process of seeking medical care. This can include travel expenses to health facilities or doctor appointments, cost incurred by caregivers, cost of food and lodging during inpatient care, and cost of home modifications. This study includes an estimation of travel expenses and caregiver costs expected to be incurred by people living with overweight and obesity. The key parameters needed for this sub-component – the average inpatient and outpatient visits by the population with overweight and obesity were sourced from a systematic review of peer-reviewed studies. See Appendix 4 for more details. We found very little data on length of hospitalization and the existing evidence was inconclusive, hence, we excluded informal caregiver time cost that required this parameter for estimation.

**Travel costs**

This is estimated separately for inpatient (hospitalization) and outpatient care. We calculated this by multiplying the average transport cost per trip by the population with overweight and obesity. The transport cost was assumed to be the cost of gasoline to drive to a health facility in a private vehicle. This was calculated by taking the country-specific data for price per liter of gasoline from the World Bank's World Development Indicators database and fuel economy and assuming a distance of five kilometers to a health facility.[11,12] For outpatient visits and hospitalizations, we use a global estimate due to the paucity of country-specific data.

$$\text{Inpatient Travel Costs} = \text{ATC} \times N_{\text{in}} \times \text{Population with Obesity}$$

where:

ATC is the average travel cost to and from health facility;

$N_{\text{in}}$  is the average number of inpatient consultations by population with overweight and obesity compared to healthy weight population.

$$\text{Outpatient Travel Costs} = \text{ATC} \times N_{\text{out}} \times \text{Population with Obesity}$$

where:

ATC is the average travel cost to and from health facility;

$N_{\text{out}}$  is the average number of outpatient consultations by population with overweight and obesity compared to healthy weight population.

The total travel cost is the sum of outpatient and inpatient travel costs.

**Informal Caregiver (ICG) costs**

These are estimated for inpatient care and includes the travel cost of informal caregivers (assuming one informal caregiver per patient).

$$\text{ICG Travel Costs} = \text{ATC} \times N_{\text{in}} \times \text{Population with Obesity}$$

where:

ATC is the average travel cost to and from health facility;

$N_{\text{in}}$  is the average number of inpatient consultations/visits by population with overweight and obesity compared to healthy weight population.

The data on hospitalization days was very scanty, hence we excluded informal caregiver time cost from our estimations. The time cost for inpatient/outpatient care for population with overweight and obesity is assumed to be included within the indirect cost from absenteeism.

**Indirect costs**

These represent the economic value of lost time, productive capacity, or quality of life due to living with overweight and obesity. In our study, this includes the economic cost of premature mortality, productivity losses from missed days of work (absenteeism), and reduced productivity while at work (presenteeism). Other relevant cost components such as long-term disability and early retirement costs were not included as it was not feasible to measure these across countries.[13] Also, in some societies there may be costs associated with weight bias (e.g. lower academic

achievement, reduced emotional support, reduced likelihood of promotion) and in others there may be a premium associated with high BMI;[14] however, the magnitude and direction of these impacts have not been studied across countries.[15] For absenteeism and presenteeism costs, we assume the same employment rates by BMI status. While it is plausible that the population with overweight and obesity may have a lower employment rate compared to the general population, the existing evidence is mixed and inconclusive.[16–23] Data on absenteeism days and presenteeism rate were sourced from a systematic review of peer-reviewed studies (See Appendix 4 for details).

### **Economic cost of premature mortality**

This is the economic value of life lost prematurely due to OAO-attributable deaths. This is calculated as the number of years of potential life lost by individuals (by age group and sex) who died from OAO multiplied by the economic value of a life year.[4,24–26] We quantify the economic costs of premature mortality using these three steps (adapted from the FCTC Tobacco Investment Case Economic Model, RTI International).[27]

#### *Step 1: Calculating number of years of potential life lost prematurely due to OAO-attributable deaths*

This denotes the number of years that individuals (by age group and sex) would have lived had they not died from OAO based on the number of years of life expectancy remaining at the age of death. To quantify this, we estimated how many people in each cohort would have been alive in future years if they had not died from OAO-related diseases (ORDs). This is because people die from causes other than ORDs and some of the people who died from overweight and obesity may not have made it to their full life expectancy because of dying from other causes. To account for these deaths, our model uses background mortality rates drawn from country-specific life tables, available online from the United Nations Population Division.

For each age and sex cohort of individuals who died from overweight and obesity in their death year, we estimate how many of those people would have been alive in future years if they had not died from overweight and obesity in their death year,

$$\text{People}_{i+1} = \text{People}_i \times (1 - \text{Deathprob}_i)$$

where  $\text{People}_i$  is the number of people alive in model year ( $i=0$  for age of death),  $\text{People}_{i+1}$  is the number of people alive in each successive years of remaining life expectancy, and  $\text{DeathProb}_i$  is the probability of death in age cohort. This calculation is performed for each age- and sex-specific cohort until no one is left alive based on life expectancy.

#### *Step 2: Life year valuation*

This study uses GDP per capita as a proxy for economic value of a life year. Other alternative proxies used in estimating cost of premature mortality include the use of average annual wages and the use of value of statistical life year[28] (see Box 1).

**Box 1: Estimating economic cost of premature mortality**

Three parameters used in estimating the economic cost of premature mortality include annual wages, value of statistical life year (VSL) and value of life year (VLY).

**Annual wages:** Some studies in the obesity literature have used average annual wages as a proxy for productivity loss from premature mortality. Average annual wages are used to estimate the foregone economic value from lost days of work due to premature death. In addition to various labor market imperfections and idiosyncrasies across countries, an obvious weakness to this is that future lost earnings do not fully represent the economic contribution of an individual to society. Also, it does not capture the value of the time spent not working such as vacation or leisure.

**Value of Statistical Life:** The value of a statistical life (VSL) is the local tradeoff rate between fatality risk and money.<sup>13</sup> It is a measure of the population's willingness to pay for reduction in mortality risk and the marginal cost of safety. It has been adopted by policy analysts as an economically valid measure for benefits that accrue to individuals for enhancements to their health and safety.<sup>13</sup> Typically calculated using contingent valuation methods, VSL calculations are available only for a small number of countries that are mostly high-income. In addition, studies from the same countries have come up with different estimates of VSL. Hence, while this approach is theoretically sound, it is not practical for the scope of this project that seeks to compare costs across countries.

**Value of Life Year:** The VLY assigns monetary terms to changes in mortality risk using a full income approach.<sup>12</sup> A country's full income combines changes in national income (e.g. GDP) and the value of change in mortality or life expectancy in a given period. A VLY is defined as the economic value in a country or region of a 1-year increase in life expectancy. Economic loss due to premature mortality from a disease is assessed using GDP, adjusted for gains in health or life expectancy in the absence of the risk factor (obesity) attributable death. On average, one VLY is estimated to be 1.6 (GDP multiplier) times the per-person income globally,<sup>14</sup> but the global figure hides considerable variation across regions and countries.

Our choice of GDP per capita is driven by our desire to value the economic contribution of every individual in society irrespective of employment status. This brings an equity lens to how economic contributions are counted. Also, as part of sensitivity analysis for an upper bound of premature mortality cost, we adjust GDP per capita for the full income value of a life year (VLY) as developed by *The Lancet* Commission on Investing in Health (CIH). This combines changes in national income (GDP per capita) and the value of change in mortality or life expectancy in a given period adjusted for the gains in health or life expectancy that would have occurred in the absence of the overweight and obesity attributable death.<sup>[29]</sup> This is done by using a multiplier applied to GDP per capita. The global GDP multiplier was calculated by CIH to be 1.6 based on life year valuation estimates from life expectancy changes between 2000 and 2011.<sup>[30]</sup> There are also estimations of regional GDP multipliers that more closely reflect variations in gains in different regions of the world (Table 3). We use this approach in sensitivity analysis to estimate an upper bound of premature mortality cost. For more information about the GDP multiplier, see Global Health 2035: A World Converging Within a Generation, Supplementary Web Appendix 3.<sup>[29]</sup> We use the regional and income-level GDP multipliers (Table 2). Though updated GDP multipliers would be ideal, they are not yet available.

**Table 2: GDP Multipliers**

| Country      | GDP Multiplier used for Study* | Global GDP Multiplier | GDP Multipliers based on Income Level groups <sup>y</sup> | GDP Multipliers for Regions           |
|--------------|--------------------------------|-----------------------|-----------------------------------------------------------|---------------------------------------|
| Brazil       | 1.4                            | 1.6                   | 2.3                                                       | 1.4 (Latin America and the Caribbean) |
| Australia    | 1.4                            | 1.6                   | 1.4                                                       | 2.2 (East Asia and the Pacific)       |
| South Africa | 4.2                            | 1.6                   | 2.3                                                       | 4.2 (Sub-Saharan Africa)              |
| India        | 2.8                            | 1.6                   | 2.3                                                       | 2.8 (South Asia)                      |
| Mexico       | 1.4                            | 1.6                   | 2.3                                                       | 1.4 (Latin America and the Caribbean) |
| Saudi Arabia | 1.4                            | 1.6                   | 1.4                                                       | 1.4 (Middle East and North Africa)    |
| Thailand     | 2.2                            | 1.6                   | 2.3                                                       | 2.2 (East Asia and the Pacific)       |
| Spain        | 1.4                            | 1.6                   | 1.4                                                       | 1.9 (Europe and Central Asia)         |

**Source:** Appendix 3 of Global Health 2035: A World Converging Within A Generation



\*GDP multipliers used are a combination of regional and income level adjusted GDP multipliers

\*Income level groups: High Income (Australia, Saudi Arabia, Spain); Low and Middle Income (Brazil, South Africa, India, Mexico, Thailand)

### Step 3: Calculating costs of OAO-attributable mortality

The total cost of premature mortality is calculated by applying the economic value of a life year (proxied by GDP per capita) to the potential years of life lost from age of death to end of life expectancy. All future costs are discounted at a rate of 3% per year to obtain the net present value. All future economic costs associated with current OAO-attributable mortality are assigned to the year in which the death occurred. Therefore, the discounted economic costs of future years are added up and assigned to the death year.

The total economic cost of OAO-attributable mortality for each sex (S) and age (A) cohort included in the model is calculated as the sum of annual costs from the age of death ( $i=0$ ) to remaining life expectancy (RLE) when no persons from the cohort would remain alive if they had not died from OAO, where VLY is the value of a life year proxied by GDP per capita in model year DY (death year) and  $People_i$  is the number of people who would have still been alive in year  $i$  had they not died of OAO.

$$\text{OAO-attributable mortality cost in cohort}_{SA} = \sum_{i=0}^{RLE} \text{VLY} \times (1 + r)^{-i} \times \text{People}_i$$

In the above formula, the net present value of costs of OAO-attributable mortality for each cohort is added together. The net present value of the economic cost of OAO-attributable mortality for all cohorts are then added up to give the total economic cost of OAO-attributable mortality.

$$\text{Total OAO-attributable mortality cost} = \sum \text{OAO-attributable mortality cost in cohort}_{SA}$$

### Productivity losses due to additional absenteeism

Absenteeism denotes when employees miss work due to illness or health conditions. Additional absenteeism refers to the average additional days of work missed because of overweight and obesity in comparison to healthy weight population. The calculation for the cost of lost productivity due to additional absenteeism among the working population with overweight and obesity is:

$$\text{Absenteeism Cost} = \text{Employed Pop. with Obesity} \times \text{Additional Days Absent} \times \text{Average Daily Wages}$$

where:

$$\text{Employed Pop. with Obesity} = \text{Employment rate} \times \text{Working Age Pop} \times \text{Obesity Prevalence}$$

$$\text{Additional Days Absent} = \text{Average number of additional days of absenteeism by working population with overweight and obesity compared to healthy weight working population.}$$

$$\text{Average Daily Wages} = \text{Calculated from Average Wage Data}$$

### Productivity losses due to additional presenteeism

Presenteeism refers to lower on-the-job productivity resulting from OAO-related impairment and disability. The calculation for the cost of lost productivity due to additional presenteeism among the working population with overweight and obesity is:

$$\text{Presenteeism Cost} = \text{Employed Pop. with Obesity} \times \text{Additional Presenteeism Rate} \times \text{Average Annual Wages}$$

where:

$$\text{Employed Pop. with Obesity} = \text{Employment rate} \times \text{Working Age Pop.} \times \text{Obesity Prevalence};$$

$$\text{Additional Presenteeism Rate} = \text{Rate of Reduced Productivity among employees with overweight and obesity.}$$

$$\text{Average Annual Wages} = \text{Calculated from Average Wage Data}$$

### Estimating future impacts of overweight and obesity

Our second main research objective is to derive country-level estimates of the projected economic impacts of overweight and obesity from 2020 to 2060.

The projections for future burden are an extension of the modeling approach used for the current burden estimation. That is, we calculated total costs for future years using projected future estimates for the different parameters in the model. The index year for current burden estimation is 2019, the most recent year with available mortality data from the Global Burden of Disease study. Our projections were therefore from 2020 to 2060.

The underlying dynamic of our model comes from the United Nations Population Division (UNPD) population projections.[31] UNPD population projections consider the three key determinants of population size (mortality, fertility and migration). We used the estimates of the UNPD medium projection variant which is based on defined assumptions of medium fertility, normal mortality, and normal international migration (see UNPD 2020 definitions of projection variants).[32] Data on life expectancy and death rates were also drawn from UNPD database. Projections for GDP and GDP Deflator up to 2027 were drawn from the IMF World Economic Outlook.[33] Historic wage data was drawn from the ILOStat Database.[34] Total health expenditure projections up to 2050 were drawn from Chang et al (2019).[35] We updated data for the projections to 2019 values for GDP, employment rates, and total health expenditures for the sources listed in Table 1 of the main manuscript and applied the annual percentage change calculated from the projection sources to align the existing long-term projections with baseline in 2019.

Some parameters such as number of inpatient and outpatient consultations, hospitalization days, absenteeism days, and presenteeism rate were assumed to stay constant over the projection period. For financial parameters such as travel cost, we adjusted for inflation in future years using GDP Deflator projections.

**Table 3: Summary of parameter projection sources**

| Projection Type                                                        | Future Parameter Values                                                                                                                                                                                                                                       | Source                                                                                                       |
|------------------------------------------------------------------------|---------------------------------------------------------------------------------------------------------------------------------------------------------------------------------------------------------------------------------------------------------------|--------------------------------------------------------------------------------------------------------------|
| Projection from secondary sources                                      | Population                                                                                                                                                                                                                                                    | United Nations Population Division (UNPD) (projections to 2060)[31]                                          |
|                                                                        | Total health expenditure per capita                                                                                                                                                                                                                           | Chang et al, 2019 (Global Burden of Disease Health Financing Collaborator Network)[35] (projections to 2050) |
|                                                                        | All-cause mortality for Obesity related diseases                                                                                                                                                                                                              | Foreman et. al, 2019. (projections to 2040)[36]                                                              |
|                                                                        | Life expectancy                                                                                                                                                                                                                                               | United Nations Population Division (projections to 2060)[31]                                                 |
|                                                                        | Background death rates                                                                                                                                                                                                                                        | United Nations Population Division (projections to 2060)[31]                                                 |
| Projection by authors                                                  | Overweight and Obesity prevalence for ages under and above 20 years and by sex.                                                                                                                                                                               | NCD-Risk Factor Collaboration (1975-2016)[37]                                                                |
|                                                                        | Obesity Attributable Fraction (OAF) of Health Expenditures.                                                                                                                                                                                                   | Current OAF estimations from OECD study[6] and projected prevalence.                                         |
|                                                                        | Annual GDP                                                                                                                                                                                                                                                    | IMF World Economic Outlook[33]                                                                               |
|                                                                        | Employment rates                                                                                                                                                                                                                                              | International Labour Organization (ILO)[38]                                                                  |
|                                                                        | Wages                                                                                                                                                                                                                                                         | ILO Global Wage Report[39], ILO[38]                                                                          |
| Assumed to stay constant (financial parameters adjusted for inflation) | Average travel cost to and from health facility; Average number of hospitalization days of population with overweight and obesity; Average number of outpatient consultations by population with overweight and obesity; Absenteeism days; Presenteeism rate. | Peer-reviewed studies.                                                                                       |

We estimated future values for parameters for which we found no existing long-term projections as described below. These are overweight and obesity prevalence, employment, GDP, wages, OAO-attributable fraction of health expenditures, and OAO-attributable mortality.

### Projected employment rates, annual wages, and GDP

Future employment rate, GDP and wages were projected using growth rates from historical data.

Employment Rates: We projected employment rates by calculating an average growth rate from country and sex-specific historical employment rate data drawn from the ILO (Table 3). We assumed a ceiling of 99% for maximum

employment rate. The sex-specific average growth rate was applied to the year with most recent data for the country and projected till 2060. For countries with no sex-specific data, we used the national employment rate.

GDP: Drawing on historical (from 1980) and projected (till 2027) GDP data from the IMF World Economic Outlook[40] (Table 3), we calculated annual growth rates in GDP. We excluded annual growth rates that were extreme outliers by computing the interquartile range of the annual growth rates for all countries in the same World Bank region. Country-specific annual growth rates below the lower outer fence (calculated as the 25<sup>th</sup> percentile minus [3\*interquartile range]) and above the upper outer fence (calculated as the 75<sup>th</sup> percentile plus [3\*interquartile range]) were excluded. Average annual growth rates were then calculated from the country-specific annual growth rates after exclusion of extreme outliers. The average annual growth rates were used to project future GDP till 2050. We applied a dampening effect to the average annual growth rates to account for the expected slowing in GDP growth as countries grow their economies. The dampening factor was calculated based on the difference in projected mean GDP growth rates for high-, middle-, and low-income country groups between 2010-2050 and 2050-2100 from expert forecasts[41]. This reduction was applied to annual GDP growth rates of all countries in these income groups from 2051 to 2060.

Wages: Historical data on wages (between 1980 and 2020) was drawn from the ILO Stat database and the ILO Global Wage Report (Table 3). This is the most complete global wage database. We calculated annual rate of change (AROC) of wages for countries with at least 2 data points. We excluded AROC values that are extreme outliers by computing the interquartile range of all AROC for all countries in the same World Bank region. AROC values below the lower outer fence (calculated as the 25<sup>th</sup> percentile minus [3\*interquartile range]) and above the upper outer fence (calculated as the 75<sup>th</sup> percentile plus [3\*interquartile range]) were excluded. We then re-calculated regional average AROC from the annual rate of change values of all countries in the same World Bank region. We projected most recent male and female wage data to 2060 by applying the average regional AROC to countries in the same region.

### **Future Obesity prevalence**

Obesity is a complex chronic disease process resulting from the interaction of various environmental factors such as high energy dense nutrition, decline in physical activity, and stress along with genetic susceptibility.[42] The upward trend in overweight and obesity prevalence globally has been attributed to increased intake of energy-dense foods which are high in fats and sugars as well as decreases in physical activity. Decline in physical activity has been attributed to the increasingly sedentary nature of many forms of work, changing modes of transportation and increasing urbanization.[43] Similar patterns have been implicated in LMICs where the rapid upward trend in overweight and obesity has been associated with ongoing economic, demographic, and nutrition transitions.[44,45]

We employed a regression-based approach for projecting future overweight and obesity prevalence. We used the historical trend of country-level annual overweight and obesity prevalence estimates from 1975 to 2016 sourced from the NCD Risk Collaboration group.[37] The data set provides estimates separately for males above 20 years old (referred to as men), females above 20 years of age (women), males below 20 years of age (boys) and females below 20 years of age (girls). Hence our projections are done for these four groups separately. Then, male, female, and total prevalence are calculated using the population estimates for each group.

Following the approach of Ward et al (2020),[46] we used multinomial regressions to predict the prevalence of BMI categories for each group. For adults the BMI categories modelled were healthy weight, overweight, moderate obesity, and severe obesity. For those below age 20, modeled BMI categories were underweight, healthy weight, overweight and obesity. This ensures that the sum of the prevalence of all categories does not exceed 100%, allows for estimation on nonlinear trends and movements of individuals between categories. We assume that trends in other variables such as urbanization and population changes (that change with time) are implicitly controlled for by having time as the predictor variable.

Forecasts for male, female, and total (national) overweight and obesity prevalence was generated using a bottom-up approach.[47] That is, forecasts for each series of prevalence for men, women, boys and girls together with their population sizes was used to calculate male (combining under and above 20 years male prevalence); female

(combining under and above 20 years female prevalence); and total (combining prevalence for male and female under and above 20 years population) overweight and obesity prevalence.

Appendix 3 Table 3 shows the overweight and obesity prevalence estimates for 2019 and 2060. Our overweight and obesity prevalence estimates are in a similar range to other studies that have projected overweight and obesity prevalence. (See Box 2 for a summary of relevant studies). Kilpi and colleagues[48] adapted the Foresight modelling framework (a two-part modeling process made up of a cross-sectional regression analysis and a microsimulation program [McPherson and colleagues[49]; Wang and colleagues[50]]) to estimate that overweight and obesity prevalence will rise to 92% in men and 75% in women by 2050 in Saudi Arabia. In another study of 10 countries in Latin America, overweight and obesity levels in 2050 are estimated to exceed 90 percent for males in two countries (Cuba and Panama) and above 85 percent for females in six countries (Chile, Cuba, Nicaragua, Panama, Peru, and Uruguay).[51]

## Box 2: Bibliography of selected studies that forecasted overweight and obesity prevalence

- Wang, Y., Beydoun, M. A., Liang, L., Caballero, B., & Kumanyika, S. K. (2008). Will all Americans become overweight or obese? Estimating the progression and cost of the US obesity epidemic. *Obesity (Silver Spring, Md.)*, 16(10), 2323–2330. <https://doi.org/10.1038/oby.2008.351>
  - ✓ Authors fitted linear regression models with the prevalence as the dependent variable and the survey time as the predictors for different sociodemographic groups in the US.
  - ✓ By 2048, all American adults would become overweight or obese, while black women will reach that state by 2034.
- Relevant studies that used/adapted the two-part modelling process developed by the UK Foresight Working Group. The first module employs a regression analysis based on series of cross-sectional data; while the second module uses a microsimulation program to produce longitudinal projections
  - ✓ McPherson K, Marsh T, Brown M. Foresight. Tackling obesities: future choices—modelling future trends in obesity & their impact on health. London: Government Office for Science, 2007.
    - The extrapolation of current trends, which underpins the microsimulation, indicates that, by 2015, 36% of males and 28% of females will be obese.
    - By 2050, 60% of males and 50% of females could be obese. The proportion of men having a healthy BMI (18.5–25kg/m<sup>2</sup>) declines from about 30% at present to less than 10% by 2050.
  - ✓ Webber, L., Kilpi, F., Marsh, T., Rtveladze, K., Brown, M. and McPherson, K., 2012. High rates of obesity and non-communicable diseases predicted across Latin America. *PloS one*, 7(8), p.e39589.
    - Projections for 10 Latin America countries—Argentina, Bolivia, Chile, Colombia, Costa Rica, Cuba, Nicaragua, Panama, Peru, Uruguay for males and females aged 20+ years.
    - Projections in 2050 exceed 90 percent for males in 2 countries and above 85 percent for females in 6 countries.
  - ✓ Pineda, E., Sanchez-Romero, L.M., Brown, M., Jaccard, A., Jewell, J., Galea, G., Webber, L. and Breda, J., 2018. Forecasting future trends in obesity across Europe: the value of improving surveillance. *Obesity facts*, 11(5), pp.360–371.
    - The four countries that are estimated to have the highest obesity prevalence were: Georgia (77%; 95% CI 58–97%); Romania (50%; 95% CI 43–57%); and Serbia (47%; 95% CI 0–175%) and Croatia (47%; 95% CI 26–68%).
    - From the 15 countries that had the best quality data (score ≥ 25 points), obesity prevalence was projected to reach between 13 and 43% by 2025. Ireland was predicted to have the highest prevalence, with 43% (95% CI 28–58%) of the population was predicted to be obese by 2025, followed by Scotland, with 37% (95% CI 29–45%).
  - ✓ Keaver, L., Webber, L., Dee, A., Shiely, F., Marsh, T., Balanda, K. and Perry, I., 2013. Application of the UK foresight obesity model in Ireland: the health and economic consequences of projected obesity trends in Ireland. *PLoS One*, 8(11), p.e79827.
    - Overweight and obesity are projected to reach levels of 83% and 74% in males and females respectively by 2020.
    - Overweight and obesity are projected to reach levels of 89% and 85% in males and females respectively by 2030.
  - ✓ Kilpi, F., Webber, L., Musaigner, A., Aitsi-Selmi, A., Marsh, T., Rtveladze, K., . . . Brown, M. (2014). Alarming predictions for obesity and non-communicable diseases in the Middle East. *Public Health Nutrition*, 17(5), 1078–1086. doi:10.1017/S1368980013000840
    - Statistical modelling of overweight/obesity trends was carried out in nine Middle East countries (Bahrain, Egypt, Iran, Jordan, Kuwait, Lebanon, Oman, Saudi Arabia and Turkey).
    - Overweight and obesity are projected to reach levels of 92% and 75% in males and females respectively by 2050.

**Overweight & Obesity-attributable fraction (OAF) of health expenditure**

We estimated future Overweight & Obesity-Attributable Fraction (OAF) of health expenditure with the following approach as explained previously: We used the average OAFs between 2020 and 2050 estimated for 52 countries from the OECD cross-country economics of obesity report. We estimated a simple linear regression of these OAFs on average overweight and obesity prevalence in the same time period.

$$\text{OAF}_i = \beta \cdot P_i + \varepsilon_i$$

where  $\text{OAF}_i$  = OAF for country  $i$ ;  $P_i$  = prevalence of overweight and obesity (point prevalence). We then use the estimated prevalence for future years to generate future OAFs based on the estimated regression coefficient using a regression through the origin (constant term was insignificant).

$$\widehat{\text{OAF}}_t = \beta \cdot \hat{P}_t$$

**Risk factor (overweight and obesity) attributable mortality**

All-cause mortality estimates for OAO-related diseases (ORDs) were obtained from projections by Foreman and colleagues [36]. We follow the approach below to estimate future OAO-attributable mortality.

**Deriving OAO-attributable deaths for future years**

The following parameters are sourced from GBD 2019: All-cause mortality by sex and age group for ORDs, Obesity Attributable Mortality, and relative risks [52] (RR) of overweight and obesity by age and sex for ORDs.

Steps:

1. We calculated all-cause mortality (total deaths) for the included OAO-related diseases (ORDs) from 2020 to 2060 using projections for 2016 and 2040 presented in Foreman and colleagues [36].
  - a. We calculated annualized rate of change by ORDs (AROC).

$$AROC = \left( \frac{\text{Value in Year } (t+h)}{\text{Value in Year } t} \right)^{\frac{1}{h}} - 1$$

Applying the AROC  $h$  times to the starting value will result in the value for the ending year.

$$M_{t+h} = M_t * (AROC + 1)^h$$

- b. We used the AROC to calculate total deaths by cause, sex and age-group for each projected year, assuming a constant rate of change till 2060.
2. We calculated Population Attributable Fraction (PAF) with the formulae below [53].

$$\text{Population Attributable Fraction (PAF)} = \frac{\text{Prev} (RR-1)}{1 + \text{Prev} (RR-1)}$$

We calculated PAF for each ORD by sex, age group and year using projected overweight and obesity prevalence and RR, making the assumption that RR is constant over time.

$$\text{Population Attributable Fraction (PAF}_{t+h}) = \frac{\text{Prev}_{t+h} (RR-1)}{1 + \text{Prev}_{t+h} (RR-1)}$$

- 
3. We then calculated risk factor or OAO-attributable deaths (OADs) for projected years ( $t$ ) by sex, age group and cause.

$$\sum_{s,a,c,t} \text{RFA deaths} = \sum_{s,a,c,t} \text{PAF} * \sum_{s,a,c,t} \text{Total deaths}$$

We adjusted the RFA deaths by calculating their rate of change from year to year which were then applied to the baseline RFA deaths from GBD 2019.

**Currency conversions**

All costs were computed in 2019 constant US dollars. Data was collected in local currency units (LCU) where possible and then adjusted to 2019 values. To adjust to 2019 values, GDP deflator data from the IMF World Economic Outlook database was used to account for inflation [33]. Next, the 2019 LCU values were converted to USD using the average annual exchange rate from the World Bank [11]. The formula for obtaining the final amount in 2019 USD is expressed as:

$$\begin{aligned} & \text{2019 USD amount} \\ &= \text{2019 LCU to USD exchange rate} \\ &\times \left[ \left( \frac{\text{GDP deflator for LCU in 2019}}{\text{GDP deflator for LCU in data year}} \right) \times \text{LCU in data year} \right] \end{aligned}$$

Estimates were also produced to account for purchasing power parity (PPP). The methods for adjusting for inflation using GDP deflator remain the same, however, instead of using an LCU to USD exchange rate, an LCU PPP conversion factor was used. PPP conversion factors were drawn from the World Bank World Development

Indicators Database, which contains PPP conversion factors for GDP and for private consumption.[11] The PPP conversion factor for GDP was used for GDP and healthcare expenditures, while the PPP conversion factor for private expenditure was used for wages and travel costs. Where only USD costs were available, costs were converted into LCU, then adjusted for inflation, and then converted to 2019 USD or PPP. By first adjusting for inflation in the local currency and then converting to USD, the final amount will more accurately reflect the price changes for local non-tradable resources, especially labor, than by first converting to USD and then adjusting for inflation using US inflation rates.[54]

## References

- 1 Okunogbe A, Nugent R, Spencer G, *et al.* Economic impacts of overweight and obesity: current and future estimates for eight countries. *BMJ Glob Health* 2021;**6**:e006351. doi:doi:10.1136/bmjgh-2021-00635
- 2 Abarca-Gómez L, Abdeen ZA, Hamid ZA, *et al.* Worldwide trends in body-mass index, underweight, overweight, and obesity from 1975 to 2016: a pooled analysis of 2416 population-based measurement studies in 128·9 million children, adolescents, and adults. *The Lancet* 2017;**390**:2627–42. doi:10.1016/S0140-6736(17)32129-3
- 3 Global Burden of Disease Collaborative N. Global Burden of Disease Study 2017 (GBD 2017) Results. 2018.
- 4 World Health Organization. *Economics of tobacco toolkit: assessment of the economic costs of smoking*. Geneva: : World Health Organization 2011. <https://apps.who.int/iris/handle/10665/44596> (accessed 24 Nov 2020).
- 5 Jo C. Cost-of-illness studies: concepts, scopes, and methods. *Clin Mol Hepatol* 2014;**20**:327–37. doi:10.3350/cmh.2014.20.4.327
- 6 OECD. *The Heavy Burden of Obesity: The Economics of Prevention*. Paris: : OECD Publishing 2019. doi:10.1787/67450d67-en
- 7 Tremmel M, Gerdtham U-G, Nilsson P, *et al.* Economic Burden of Obesity: A Systematic Literature Review. *Int J Environ Res Public Health* 2017;**14**:435. doi:10.3390/ijerph14040435
- 8 WHO | Metrics: Population Attributable Fraction (PAF). WHO. [https://www.who.int/healthinfo/global\\_burden\\_disease/metrics\\_paf/en/](https://www.who.int/healthinfo/global_burden_disease/metrics_paf/en/) (accessed 2 Nov 2020).
- 9 Goodchild M, Nargis N, Tursan d’Espaignet E. Global economic cost of smoking-attributable diseases. *Tob Control* 2017;**27**:58–64. doi:10.1136/tobaccocontrol-2016-053305
- 10 Pitayatiennanan P, Butchon R, Yothasamut J, *et al.* Economic costs of obesity in Thailand: a retrospective cost-of-illness study. *BMC Health Serv Res* 2014;**14**:146. doi:10.1186/1472-6963-14-146
- 11 World Development Indicators | DataBank. <https://databank.worldbank.org/reports.aspx?source=world-development-indicators> (accessed 21 Sep 2020).
- 12 International Energy Agency. Fuel Economy in Major Car Markets: Technology and Policy Drivers 2005-2017 – Analysis. IEA. <https://www.iea.org/reports/fuel-economy-in-major-car-markets> (accessed 2 Oct 2021).
- 13 Goettler A, Grosse A, Sonntag D. Productivity loss due to overweight and obesity: a systematic review of indirect costs. *BMJ Open* 2017;**7**:e014632. doi:10.1136/bmjopen-2016-014632
- 14 Macchi E. Worth your weight? Experimental evidence on the benefits of obesity in low-income countries. 2020. [https://elisamacchi.github.io/papers/yyw\\_macchi\\_draft.pdf](https://elisamacchi.github.io/papers/yyw_macchi_draft.pdf) (accessed 7 Dec 2020).
- 15 Singh K, Russell-Mayhew S, von Ranson K, *et al.* Is there more to the equation? Weight bias and the costs of obesity. *Can J Public Health Rev Can Santé Publique* 2018;**110**:17–20. doi:10.17269/s41997-018-0146-2
- 16 Campos-Vazquez RM, Gonzalez E. Obesity and hiring discrimination. *Econ Hum Biol* 2020;**37**:100850. doi:10.1016/j.ehb.2020.100850
- 17 Dang A, Maitra P, Menon N. Labor market engagement and the body mass index of working adults: Evidence from India. *Econ Hum Biol* 2019;**33**:58–77. doi:10.1016/j.ehb.2019.01.006



- 18 Al-Hanawi MK, Keetile M. Socio-Economic and Demographic Correlates of Non-communicable Disease Risk Factors Among Adults in Saudi Arabia. *Front Med* 2021;**8**:605912. doi:10.3389/fmed.2021.605912
- 19 Al-Hanawi MK, Chirwa GC, Kamninga TM. Decomposition of Gender Differences in Body Mass Index in Saudi Arabia using Unconditional Quantile Regression: Analysis of National-Level Survey Data. *Int J Environ Res Public Health* 2020;**17**:2330. doi:10.3390/ijerph17072330
- 20 Palomo L, Félix-Redondo F-J, Lozano-Mera L, *et al.* Cardiovascular risk factors, lifestyle, and social determinants: a cross-sectional population study. *Br J Gen Pract J R Coll Gen Pract* 2014;**64**:e627-633. doi:10.3399/bjgp14X681793
- 21 Pit SW, Byles J. The Association of Health and Employment in Mature Women: A Longitudinal Study. *J Womens Health* 2012;**21**:273–80. doi:10.1089/jwh.2011.2872
- 22 Langley PC, Tornero Molina J, Margarit Ferri C, *et al.* The association of pain with labor force participation, absenteeism, and presenteeism in Spain. *J Med Econ* 2011;**14**:835–45. doi:10.3111/13696998.2011.632045
- 23 Pisa P, Behanan R, Vorster H, *et al.* Social drift of cardiovascular disease risk factors in Africans from the North West Province of South Africa: the PURE study. *Cardiovasc J Afr* 2012;**23**:371–8. doi:10.5830/CVJA-2012-018
- 24 Barcelo A, Arredondo A, Gordillo-Tobar A, *et al.* The cost of diabetes in Latin America and the Caribbean in 2015: Evidence for decision and policy makers. *J Glob Health*;7. doi:10.7189/jogh.07.020410
- 25 Kirigia JM, Mburugu GN. The monetary value of human lives lost due to neglected tropical diseases in Africa. *Infect Dis Poverty* 2017;**6**. doi:10.1186/s40249-017-0379-y
- 26 Robinson LA, Hammit JK, Cecchini M, *et al.* Reference Case Guidelines for Benefit-Cost Analysis in Global Health and Development. Boston, MA: : Harvard T.H. Chan School of Public Health, Bill and Melinda Gates Foundation 2019. <https://cdn1.sph.harvard.edu/wp-content/uploads/sites/2447/2019/05/BCA-Guidelines-May-2019.pdf>
- 27 RTI International. FCTC Tobacco Investment Case Economic Model: Methodology. (Unpublished). 2019.
- 28 Kniesner TJ, Viscusi WK. The Value of a Statistical Life. *SSRN Electron J* Published Online First: 2019. doi:10.2139/ssrn.3379967
- 29 Jamison DT, Summers LH, Alleyne G, *et al.* Global health 2035: a world converging within a generation. *The Lancet* 2013;**382**:1898–955. doi:10.1016/S0140-6736(13)62105-4
- 30 Jamison DT, Summers LH, Alleyne G, *et al.* Global health 2035: a world converging within a generation, Supplementary appendix 3. *The Lancet* 2013;**382**:1898–955. doi:10.1016/S0140-6736(13)62105-4
- 31 World Population Prospects - Population Division - United Nations. <https://population.un.org/wpp/> (accessed 9 Oct 2020).
- 32 World Population Prospects - Population Division - United Nations. <https://population.un.org/wpp/DefinitionOfProjectionVariants/> (accessed 9 Oct 2020).
- 33 World Economic Outlook. IMF. <https://www.imf.org/en/Publications/WEO> (accessed 8 Apr 2022).
- 34 International Labour Organization. ILOSTAT. <https://ilostat.ilo.org/> (accessed 2 Oct 2021).

- 35 Chang AY, Cowling K, Micah AE, *et al.* Past, present, and future of global health financing: a review of development assistance, government, out-of-pocket, and other private spending on health for 195 countries, 1995–2050. *The Lancet* 2019;**393**:2233–60. doi:10.1016/S0140-6736(19)30841-4
- 36 Foreman KJ, Marquez N, Dolgert A, *et al.* Forecasting life expectancy, years of life lost, and all-cause and cause-specific mortality for 250 causes of death: reference and alternative scenarios for 2016–40 for 195 countries and territories. *The Lancet* 2018;**392**:2052–90. doi:10.1016/S0140-6736(18)31694-5
- 37 NCD-RisC. Data Downloads: Download files containing country risk factor data. 2017.<http://ncdrisc.org/data-downloads.html>
- 38 International Labour Organization. Employment-to-population ratio by sex and age -- ILO modelled estimates, Nov. 2019. 2020.<https://ilostat.ilo.org/data>
- 39 International Labour Office. *Global wage report 2018/19: what lies behind gender pay gaps*. 2018.
- 40 World Economic Outlook Database, April 2021. IMF. <https://www.imf.org/en/Publications/WEO/weo-database/2021/April> (accessed 18 Apr 2021).
- 41 Christensen P, Gillingham K, Nordhaus W. Uncertainty in forecasts of long-run economic growth. *Proc Natl Acad Sci* 2018;**115**:5409–14. doi:10.1073/pnas.1713628115
- 42 Bray GA, Kim KK, Wilding JPH. Obesity: a chronic relapsing progressive disease process. A position statement of the World Obesity Federation. *Obes Rev* 2017;**18**:715–23. doi:10.1111/obr.12551
- 43 WHO. Obesity and overweight. World Health Organ. 2020.<https://www.who.int/news-room/fact-sheets/detail/obesity-and-overweight> (accessed 10 Dec 2020).
- 44 Tuoyire DA, Kumi-Kyereme A, Doku DT. Socio-demographic trends in overweight and obesity among parous and nulliparous women in Ghana. *BMC Obes* 2016;**3**. doi:10.1186/s40608-016-0124-2
- 45 Ziraba AK, Fotso JC, Ochako R. Overweight and obesity in urban Africa: A problem of the rich or the poor? *BMC Public Health* 2009;**9**:465. doi:10.1186/1471-2458-9-465
- 46 Ward ZJ, Bleich SN, Cradock AL, *et al.* Projected U.S. State-Level Prevalence of Adult Obesity and Severe Obesity. *N Engl J Med* 2019;**381**:2440–50. doi:10.1056/NEJMsa1909301
- 47 Hyndman RJ, Athanasopoulos G. *Forecasting: Principles and Practice*. 2nd edition. Melbourne, Australia: : OTexts 2018. <https://Otexts.com/fpp2/> (accessed 10 Dec 2020).
- 48 Kilpi F, Webber L, Musaigner A, *et al.* Alarming predictions for obesity and non-communicable diseases in the Middle East. *Public Health Nutr* 2014;**17**:1078–86. doi:10.1017/S1368980013000840
- 49 McPherson K, Marsh T, Brown M. Tackling Obesities: Future Choices - Modelling Future Trends in Obesity and the Impact on Health. 2nd edition. UK Government Office for Science, Foresight Programme 2010. [https://assets.publishing.service.gov.uk/government/uploads/system/uploads/attachment\\_data/file/287937/07-1184x-tackling-obesities-future-choices-report.pdf](https://assets.publishing.service.gov.uk/government/uploads/system/uploads/attachment_data/file/287937/07-1184x-tackling-obesities-future-choices-report.pdf)
- 50 Wang YC, McPherson K, Marsh T, *et al.* Health and economic burden of the projected obesity trends in the USA and the UK. *Lancet Lond Engl* 2011;**378**:815–25. doi:10.1016/S0140-6736(11)60814-3
- 51 Webber L, Kilpi F, Marsh T, *et al.* High Rates of Obesity and Non-Communicable Diseases Predicted across Latin America. *PLoS ONE* 2012;**7**:e39589. doi:10.1371/journal.pone.0039589

- 52 Global Burden of Disease Collaborative Network. Global Burden of Disease Study 2019 (GBD 2019) Relative Risks. Seattle, United States of America: : Institute for Health Metrics and Evaluation (IHME) 2020.
- 53 Lin C-K, Chen S-T. Estimation and application of population attributable fraction in ecological studies. *Environ Health* 2019;**18**:52. doi:10.1186/s12940-019-0492-4
- 54 Turner HC, Lauer JA, Tran BX, *et al.* Adjusting for Inflation and Currency Changes Within Health Economic Studies. *Value Health* 2019;**22**:1026–32. doi:10.1016/j.jval.2019.03.021

## Appendix 2: Additional Tables

**Table 1: List of included countries by income group**

| Income group      | Countries                                                                                                                                                                                                                                                                                                                                                                                                                                                                                                                                                |
|-------------------|----------------------------------------------------------------------------------------------------------------------------------------------------------------------------------------------------------------------------------------------------------------------------------------------------------------------------------------------------------------------------------------------------------------------------------------------------------------------------------------------------------------------------------------------------------|
| Low (21)          | Afghanistan, Burkina Faso, Burundi, Central African Republic, Chad, Democratic Republic of Congo, Ethiopia, The Gambia, Guinea, Guinea-Bissau, Haiti, Madagascar, Malawi, Mali, Mozambique, Niger, Rwanda, Sierra Leone, Tajikistan, Togo, Uganda                                                                                                                                                                                                                                                                                                        |
| Lower middle (44) | Algeria, Angola, Bangladesh, Benin, Bhutan, Bolivia, Cabo Verde, Cambodia, Cameroon, Comoros, Rep. of Congo, Côte d'Ivoire, Egypt, El Salvador, Eswatini, Ghana, Honduras, India, Kenya, Kyrgyz Republic, Lao PDR, Lesotho, Mauritania, Moldova, Mongolia, Morocco, Myanmar, Nepal, Nicaragua, Nigeria, Pakistan, Philippines, Senegal, Sri Lanka, Tanzania, Timor-Leste, Tunisia, Ukraine, Uzbekistan, Vanuatu, Vietnam, West Bank and Gaza, Zambia, Zimbabwe                                                                                           |
| Upper middle (44) | Albania, Argentina, Armenia, Azerbaijan, Belarus, Belize, Bosnia and Herzegovina, Botswana, Brazil, Bulgaria, China, Colombia, Costa Rica, Dominican Republic, Ecuador, Equatorial Guinea, Fiji, Gabon, Georgia, Guatemala, Indonesia, Iran, Iraq, Jamaica, Jordan, Kazakhstan, Lebanon, Libya, Malaysia, Maldives, Mexico, Montenegro, Namibia, North Macedonia, Paraguay, Peru, Russian Federation, Samoa, Serbia, South Africa, Thailand, Tonga, Turkey, Turkmenistan                                                                                 |
| High (52)         | Australia, Austria, The Bahamas, Bahrain, Barbados, Belgium, Brunei Darussalam, Canada, Chile, Croatia, Cyprus, Czech Republic, Denmark, Estonia, Finland, France, Germany, Greece, Hungary, Iceland, Ireland, Israel, Italy, Japan, Korea, Kuwait, Latvia, Lithuania, Luxembourg, Malta, Mauritius, Netherlands, New Zealand, Norway, Oman, Panama, Poland, Portugal, Qatar, Romania, Saudi Arabia, Singapore, Slovak Republic, Slovenia, Spain, Sweden, Switzerland, Trinidad and Tobago, United Arab Emirates, United Kingdom, United States, Uruguay |

**Table 2: List of included countries by WHO region**

| WHO region | Countries                                                                                                                                                                                                                                                             |
|------------|-----------------------------------------------------------------------------------------------------------------------------------------------------------------------------------------------------------------------------------------------------------------------|
| AFR (42)   | Algeria, Angola, Benin, Botswana, Burkina Faso, Burundi, Cabo Verde, Cameroon, Central African Republic, Chad, Comor                                                                                                                                                  |
| EMR (17)   | Afghanistan, Bahrain, Egypt, Iran, Iraq, Jordan, Kuwait, Lebanon, Libya, Morocco, Oman, Pakistan, Qatar, Saudi Arabia, Tunisia, United Arab Emirates, West Bank and Gaza                                                                                              |
| EUR (50)   | Albania, Armenia, Austria, Azerbaijan, Belarus, Belgium, Bosnia and Herzegovina, Bulgaria, Croatia, Cyprus, Czech Repub Turkey, Turkmenistan, Ukraine, United Kingdom, Uzbekistan                                                                                     |
| AMR (25)   | Argentina, The Bahamas, Barbados, Belize, Bolivia, Brazil, Canada, Chile, Colombia, Costa Rica, Dominican Republic, Ecuador, El Salvador, Guatemala, Haiti, Honduras, Jamaica, Mexico, Nicaragua, Panama, Paraguay, Peru, Trinidad and Tobago, United States, Uruguay |
| SEAR (10)  | Bangladesh, Bhutan, India, Indonesia, Maldives, Myanmar, Nepal, Sri Lanka, Thailand, Timor-Leste                                                                                                                                                                      |
| WPR (17)   | Australia, Brunei Darussalam, Cambodia, China, Fiji, Japan, Rep. of Korea, Lao PDR, Malaysia, Mongolia, New Zealand, Philippines, Samoa, Singapore, Tonga, Vanuatu, Vietnam                                                                                           |

**Table 3: Adult, childhood/adolescent, and overall overweight and obesity prevalence, by sex, 2019 and 2060**

| Country             | Year | Overall overweight and obesity prevalence | Adult male prevalence | Adult female prevalence | Childhood and adolescent male prevalence | Childhood and adolescent female prevalence |
|---------------------|------|-------------------------------------------|-----------------------|-------------------------|------------------------------------------|--------------------------------------------|
| Afghanistan         | 2019 | 18.5%                                     | 22.6%                 | 30.1%                   | 11.5%                                    | 12.3%                                      |
| Afghanistan         | 2060 | 73.8%                                     | 63.8%                 | 76.5%                   | 80.3%                                    | 84.0%                                      |
| Albania             | 2019 | 53.2%                                     | 67.6%                 | 53.9%                   | 35.0%                                    | 24.6%                                      |
| Albania             | 2060 | 86.3%                                     | 92.7%                 | 77.8%                   | 93.5%                                    | 86.7%                                      |
| Algeria             | 2019 | 56.5%                                     | 63.3%                 | 71.8%                   | 38.8%                                    | 36.8%                                      |
| Algeria             | 2060 | 93.3%                                     | 95.0%                 | 94.1%                   | 92.1%                                    | 87.6%                                      |
| Angola              | 2019 | 21.2%                                     | 22.0%                 | 40.0%                   | 8.8%                                     | 18.5%                                      |
| Angola              | 2060 | 77.3%                                     | 64.0%                 | 86.1%                   | 75.6%                                    | 83.7%                                      |
| Antigua and Barbuda | 2019 | 46.4%                                     | 44.9%                 | 60.3%                   | 29.7%                                    | 31.3%                                      |
| Antigua and Barbuda | 2060 | 82.9%                                     | 80.2%                 | 86.3%                   | 82.0%                                    | 80.6%                                      |
| Argentina           | 2019 | 57.7%                                     | 70.8%                 | 63.1%                   | 43.8%                                    | 33.9%                                      |
| Argentina           | 2060 | 82.1%                                     | 92.5%                 | 82.4%                   | 75.9%                                    | 55.2%                                      |
| Armenia             | 2019 | 48.1%                                     | 58.4%                 | 57.7%                   | 19.8%                                    | 21.6%                                      |
| Armenia             | 2060 | 72.3%                                     | 84.0%                 | 77.6%                   | 43.9%                                    | 39.4%                                      |
| Australia           | 2019 | 61.1%                                     | 75.8%                 | 62.5%                   | 39.2%                                    | 35.9%                                      |
| Australia           | 2060 | 83.9%                                     | 95.0%                 | 85.9%                   | 66.6%                                    | 56.2%                                      |
| Austria             | 2019 | 52.9%                                     | 67.1%                 | 50.2%                   | 33.7%                                    | 25.7%                                      |
| Austria             | 2060 | 76.1%                                     | 90.9%                 | 71.1%                   | 63.0%                                    | 47.2%                                      |
| Azerbaijan          | 2019 | 45.8%                                     | 56.2%                 | 57.1%                   | 20.1%                                    | 20.6%                                      |
| Azerbaijan          | 2060 | 76.1%                                     | 84.2%                 | 80.9%                   | 55.3%                                    | 49.3%                                      |
| Bahamas             | 2019 | 60.8%                                     | 66.3%                 | 72.9%                   | 41.1%                                    | 39.5%                                      |
| Bahamas             | 2060 | 87.9%                                     | 93.3%                 | 89.9%                   | 79.0%                                    | 70.1%                                      |
| Bahrain             | 2019 | 61.5%                                     | 67.9%                 | 71.5%                   | 39.0%                                    | 36.0%                                      |
| Bahrain             | 2060 | 84.3%                                     | 90.0%                 | 84.8%                   | 71.9%                                    | 58.1%                                      |

|                          |      |       |       |       |       |       |
|--------------------------|------|-------|-------|-------|-------|-------|
| Bangladesh               | 2019 | 18.9% | 20.8% | 25.5% | 12.2% | 11.1% |
| Bangladesh               | 2060 | 70.3% | 66.4% | 69.0% | 82.3% | 78.4% |
| Barbados                 | 2019 | 50.5% | 48.8% | 63.7% | 30.5% | 31.2% |
| Barbados                 | 2060 | 85.4% | 84.4% | 88.0% | 83.2% | 80.7% |
| Belarus                  | 2019 | 55.8% | 67.6% | 60.8% | 31.0% | 21.8% |
| Belarus                  | 2060 | 80.4% | 92.0% | 76.5% | 78.8% | 57.0% |
| Belgium                  | 2019 | 55.0% | 72.5% | 54.5% | 27.0% | 26.3% |
| Belgium                  | 2060 | 69.7% | 91.6% | 67.2% | 35.4% | 30.0% |
| Belize                   | 2019 | 47.9% | 52.7% | 65.1% | 31.2% | 31.4% |
| Belize                   | 2060 | 83.8% | 86.2% | 86.9% | 77.7% | 72.5% |
| Benin                    | 2019 | 23.5% | 24.7% | 43.1% | 8.8%  | 19.4% |
| Benin                    | 2060 | 73.4% | 65.0% | 86.2% | 62.3% | 78.2% |
| Bhutan                   | 2019 | 25.7% | 29.6% | 35.1% | 15.0% | 12.5% |
| Bhutan                   | 2060 | 83.5% | 80.9% | 84.9% | 90.2% | 83.9% |
| Bolivia                  | 2019 | 50.4% | 58.2% | 65.4% | 31.7% | 35.4% |
| Bolivia                  | 2060 | 88.3% | 91.4% | 90.6% | 81.9% | 79.6% |
| Bosnia and Herzegovina   | 2019 | 50.8% | 64.0% | 50.6% | 30.2% | 21.0% |
| Bosnia and Herzegovina   | 2060 | 79.9% | 87.9% | 71.0% | 86.7% | 78.9% |
| Botswana                 | 2019 | 40.7% | 37.7% | 67.2% | 14.8% | 33.6% |
| Botswana                 | 2060 | 92.3% | 88.3% | 95.5% | 89.8% | 96.4% |
| Brazil                   | 2019 | 53.8% | 63.6% | 61.0% | 35.1% | 30.5% |
| Brazil                   | 2060 | 88.1% | 93.7% | 87.8% | 84.1% | 70.0% |
| Brunei Darussalam        | 2019 | 41.1% | 45.7% | 45.4% | 36.4% | 25.2% |
| Brunei Darussalam        | 2060 | 86.0% | 92.0% | 81.3% | 87.4% | 78.3% |
| Bulgaria                 | 2019 | 58.6% | 72.9% | 57.6% | 37.9% | 26.0% |
| Bulgaria                 | 2060 | 81.2% | 92.3% | 72.7% | 84.3% | 68.9% |
| Burkina Faso             | 2019 | 16.5% | 17.9% | 33.3% | 6.2%  | 12.1% |
| Burkina Faso             | 2060 | 67.8% | 53.4% | 84.2% | 65.8% | 66.7% |
| Burundi                  | 2019 | 18.2% | 15.7% | 34.1% | 7.7%  | 17.8% |
| Burundi                  | 2060 | 66.9% | 40.8% | 81.3% | 66.0% | 83.2% |
| Cabo Verde               | 2019 | 32.2% | 33.3% | 49.4% | 11.9% | 22.0% |
| Cabo Verde               | 2060 | 85.8% | 83.4% | 91.8% | 76.6% | 82.1% |
| Cambodia                 | 2019 | 20.8% | 21.5% | 28.1% | 18.1% | 10.9% |
| Cambodia                 | 2060 | 72.5% | 67.4% | 71.4% | 92.8% | 68.4% |
| Cameroon                 | 2019 | 26.7% | 29.4% | 47.8% | 10.1% | 22.2% |
| Cameroon                 | 2060 | 77.3% | 74.8% | 88.4% | 64.6% | 76.7% |
| Canada                   | 2019 | 62.2% | 75.0% | 63.2% | 39.3% | 34.0% |
| Canada                   | 2060 | 86.6% | 95.1% | 87.8% | 73.6% | 59.9% |
| Central African Republic | 2019 | 19.7% | 20.6% | 37.0% | 7.9%  | 17.2% |
| Central African Republic | 2060 | 64.1% | 50.6% | 74.3% | 60.9% | 71.9% |
| Chad                     | 2019 | 17.0% | 18.2% | 33.9% | 6.5%  | 14.5% |
| Chad                     | 2060 | 62.0% | 47.2% | 77.0% | 54.7% | 68.5% |
| Chile                    | 2019 | 59.4% | 69.1% | 65.2% | 40.1% | 35.4% |
| Chile                    | 2060 | 84.0% | 91.8% | 84.1% | 74.5% | 59.3% |
| China                    | 2019 | 36.3% | 38.8% | 34.0% | 43.8% | 26.5% |
| China                    | 2060 | 83.2% | 86.6% | 72.8% | 98.7% | 96.1% |
| China (Hong Kong SAR)    | 2019 | 42.2% | 51.0% | 39.6% | 36.7% | 20.7% |
| China (Hong Kong SAR)    | 2060 | 64.0% | 83.4% | 51.9% | 70.1% | 37.3% |
| Colombia                 | 2019 | 53.0% | 62.5% | 66.1% | 26.1% | 29.7% |
| Colombia                 | 2060 | 85.6% | 91.8% | 88.1% | 67.0% | 67.4% |
| Comoros                  | 2019 | 22.7% | 21.0% | 40.0% | 9.2%  | 20.7% |
| Comoros                  | 2060 | 66.4% | 47.7% | 79.5% | 62.0% | 80.4% |
| Congo                    | 2019 | 23.4% | 27.6% | 42.1% | 9.3%  | 16.2% |
| Congo                    | 2060 | 70.3% | 68.8% | 79.1% | 68.5% | 61.2% |
| Costa Rica               | 2019 | 58.9% | 65.6% | 68.7% | 36.7% | 39.5% |
| Costa Rica               | 2060 | 94.3% | 96.7% | 94.4% | 89.2% | 88.3% |
| Cote d'Ivoire            | 2019 | 25.2% | 27.6% | 44.2% | 11.1% | 20.5% |
| Cote d'Ivoire            | 2060 | 75.2% | 70.9% | 84.1% | 70.3% | 73.4% |
| Croatia                  | 2019 | 57.1% | 70.4% | 56.4% | 38.2% | 26.1% |
| Croatia                  | 2060 | 82.9% | 91.6% | 74.7% | 87.9% | 76.4% |
| Cuba                     | 2019 | 57.5% | 60.4% | 67.4% | 35.6% | 33.0% |
| Cuba                     | 2060 | 86.7% | 92.1% | 87.8% | 76.5% | 64.6% |
| Cyprus                   | 2019 | 59.6% | 72.1% | 58.9% | 44.3% | 35.4% |
| Cyprus                   | 2060 | 85.9% | 94.5% | 81.8% | 79.6% | 69.9% |
| Czech Republic           | 2019 | 57.8% | 73.3% | 57.4% | 34.4% | 23.2% |
| Czech Republic           | 2060 | 74.7% | 89.8% | 65.9% | 73.3% | 51.7% |
| Denmark                  | 2019 | 52.8% | 69.1% | 50.6% | 31.1% | 25.8% |
| Denmark                  | 2060 | 71.9% | 91.9% | 67.3% | 51.7% | 34.8% |
| Djibouti                 | 2019 | 33.5% | 36.9% | 48.5% | 15.2% | 24.0% |
| Djibouti                 | 2060 | 65.5% | 70.8% | 72.0% | 46.9% | 49.8% |
| Dominican Republic       | 2019 | 56.0% | 61.9% | 70.2% | 38.9% | 38.0% |

|                    |      |       |       |       |       |       |
|--------------------|------|-------|-------|-------|-------|-------|
| Dominican Republic | 2060 | 93.2% | 96.1% | 93.9% | 89.9% | 85.0% |
| DR Congo           | 2019 | 19.1% | 20.1% | 36.0% | 7.4%  | 17.0% |
| DR Congo           | 2060 | 68.8% | 55.1% | 78.8% | 63.5% | 79.1% |
| Ecuador            | 2019 | 51.2% | 58.5% | 64.5% | 32.6% | 33.9% |
| Ecuador            | 2060 | 87.3% | 90.7% | 89.0% | 81.0% | 77.2% |
| Egypt              | 2019 | 56.5% | 61.3% | 73.2% | 41.3% | 42.6% |
| Egypt              | 2060 | 89.4% | 89.5% | 91.7% | 87.7% | 86.5% |
| El Salvador        | 2019 | 55.3% | 63.2% | 67.9% | 34.0% | 39.9% |
| El Salvador        | 2060 | 92.0% | 94.7% | 92.7% | 85.5% | 86.8% |
| Equatorial Guinea  | 2019 | 21.8% | 21.7% | 40.5% | 8.2%  | 17.9% |
| Equatorial Guinea  | 2060 | 68.7% | 56.2% | 81.1% | 65.1% | 76.6% |
| Eritrea            | 2019 | 18.4% | 16.4% | 31.5% | 7.6%  | 18.8% |
| Eritrea            | 2060 | 62.4% | 40.7% | 74.1% | 60.0% | 82.8% |
| Estonia            | 2019 | 50.5% | 63.1% | 53.9% | 24.0% | 18.8% |
| Estonia            | 2060 | 66.0% | 83.6% | 59.1% | 53.7% | 36.0% |
| Ethiopia           | 2019 | 16.7% | 15.2% | 31.4% | 5.7%  | 15.2% |
| Ethiopia           | 2060 | 57.9% | 39.4% | 74.4% | 48.4% | 70.9% |
| Fiji               | 2019 | 57.8% | 65.2% | 72.6% | 34.2% | 45.0% |
| Fiji               | 2060 | 90.1% | 93.3% | 92.3% | 82.9% | 84.0% |
| Finland            | 2019 | 56.7% | 72.2% | 55.2% | 35.3% | 27.9% |
| Finland            | 2060 | 80.7% | 94.2% | 77.1% | 66.4% | 51.0% |
| France             | 2019 | 55.7% | 71.2% | 55.3% | 34.1% | 30.7% |
| France             | 2060 | 76.0% | 92.0% | 72.5% | 56.6% | 50.4% |
| French Polynesia   | 2019 | 78.5% | 84.1% | 86.2% | 60.4% | 66.3% |
| French Polynesia   | 2060 | 95.1% | 96.0% | 94.8% | 94.3% | 93.3% |
| Gabon              | 2019 | 35.1% | 41.0% | 54.7% | 15.5% | 25.1% |
| Gabon              | 2060 | 83.6% | 88.2% | 89.2% | 75.4% | 73.4% |
| Gambia             | 2019 | 25.2% | 28.7% | 45.4% | 10.8% | 19.7% |
| Gambia             | 2060 | 80.5% | 77.0% | 89.6% | 74.2% | 77.8% |
| Georgia            | 2019 | 48.6% | 58.5% | 57.1% | 22.5% | 20.8% |
| Georgia            | 2060 | 77.6% | 87.0% | 81.6% | 61.4% | 50.1% |
| Germany            | 2019 | 55.0% | 70.3% | 52.0% | 31.8% | 26.6% |
| Germany            | 2060 | 75.3% | 92.1% | 70.4% | 56.4% | 43.3% |
| Ghana              | 2019 | 25.2% | 25.3% | 46.6% | 8.1%  | 18.8% |
| Ghana              | 2060 | 72.3% | 66.6% | 87.6% | 55.0% | 73.2% |
| Greece             | 2019 | 61.5% | 73.0% | 60.1% | 45.3% | 35.5% |
| Greece             | 2060 | 82.8% | 93.6% | 77.8% | 73.9% | 61.5% |
| Grenada            | 2019 | 48.5% | 48.7% | 63.8% | 30.6% | 31.4% |
| Grenada            | 2060 | 88.2% | 87.4% | 90.6% | 86.7% | 84.2% |
| Guatemala          | 2019 | 48.5% | 56.7% | 64.7% | 31.0% | 35.7% |
| Guatemala          | 2060 | 89.0% | 90.7% | 90.9% | 83.7% | 84.8% |
| Guinea             | 2019 | 20.3% | 21.4% | 39.0% | 6.8%  | 16.5% |
| Guinea             | 2060 | 66.8% | 56.6% | 82.4% | 52.6% | 72.3% |
| Guinea Bissau      | 2019 | 24.1% | 25.9% | 43.5% | 9.4%  | 18.8% |
| Guinea Bissau      | 2060 | 79.8% | 73.6% | 89.6% | 71.9% | 81.4% |
| Haiti              | 2019 | 49.2% | 56.4% | 64.3% | 38.0% | 30.6% |
| Haiti              | 2060 | 95.6% | 97.2% | 95.4% | 95.9% | 91.4% |
| Honduras           | 2019 | 49.4% | 57.5% | 65.0% | 30.3% | 35.6% |
| Honduras           | 2060 | 91.2% | 92.7% | 92.6% | 85.7% | 87.3% |
| Hungary            | 2019 | 57.2% | 72.7% | 55.7% | 35.2% | 25.6% |
| Hungary            | 2060 | 77.9% | 91.1% | 68.0% | 79.8% | 64.4% |
| Iceland            | 2019 | 55.1% | 72.7% | 54.2% | 34.3% | 28.2% |
| Iceland            | 2060 | 74.8% | 93.3% | 70.4% | 52.5% | 37.6% |
| India              | 2019 | 17.4% | 20.4% | 24.7% | 9.3%  | 7.3%  |
| India              | 2060 | 64.5% | 60.5% | 64.6% | 78.9% | 62.3% |
| Indonesia          | 2019 | 28.8% | 29.1% | 36.6% | 22.7% | 19.3% |
| Indonesia          | 2060 | 87.1% | 83.9% | 86.4% | 94.6% | 91.6% |
| Iran               | 2019 | 56.2% | 63.0% | 70.8% | 33.9% | 31.4% |
| Iran               | 2060 | 91.5% | 94.0% | 92.6% | 89.3% | 81.7% |
| Iraq               | 2019 | 52.9% | 65.8% | 72.0% | 36.2% | 35.6% |
| Iraq               | 2060 | 85.1% | 90.7% | 88.9% | 79.3% | 72.9% |
| Ireland            | 2019 | 57.7% | 71.7% | 60.4% | 36.7% | 35.0% |
| Ireland            | 2060 | 89.3% | 95.4% | 89.7% | 79.4% | 73.2% |
| Israel             | 2019 | 57.2% | 75.4% | 61.2% | 40.6% | 33.7% |
| Israel             | 2060 | 74.3% | 92.9% | 74.1% | 57.2% | 45.5% |
| Italy              | 2019 | 57.9% | 69.8% | 54.5% | 43.0% | 36.4% |
| Italy              | 2060 | 77.8% | 89.9% | 71.6% | 66.5% | 59.3% |
| Jamaica            | 2019 | 52.2% | 52.3% | 68.2% | 33.8% | 35.5% |
| Jamaica            | 2060 | 89.6% | 90.8% | 91.6% | 85.7% | 82.3% |
| Japan              | 2019 | 26.6% | 34.9% | 22.9% | 19.8% | 13.3% |
| Japan              | 2060 | 45.8% | 66.0% | 33.9% | 32.3% | 20.9% |

|                                  |      |       |       |       |       |       |
|----------------------------------|------|-------|-------|-------|-------|-------|
| Jordan                           | 2019 | 59.0% | 73.2% | 77.9% | 38.4% | 37.2% |
| Jordan                           | 2060 | 92.0% | 96.0% | 94.2% | 86.5% | 79.4% |
| Kazakhstan                       | 2019 | 45.0% | 58.5% | 56.5% | 21.8% | 21.0% |
| Kazakhstan                       | 2060 | 74.6% | 85.7% | 80.1% | 57.9% | 49.6% |
| Kenya                            | 2019 | 21.2% | 18.2% | 38.5% | 7.9%  | 20.2% |
| Kenya                            | 2060 | 67.8% | 47.5% | 83.1% | 60.1% | 84.3% |
| Kiribati                         | 2019 | 75.0% | 82.2% | 86.0% | 59.5% | 67.7% |
| Kiribati                         | 2060 | 97.7% | 97.6% | 97.6% | 98.1% | 97.8% |
| Kuwait                           | 2019 | 69.2% | 76.7% | 78.6% | 49.0% | 43.6% |
| Kuwait                           | 2060 | 87.5% | 94.0% | 89.6% | 78.8% | 63.9% |
| Kyrgyzstan                       | 2019 | 37.8% | 50.7% | 51.9% | 17.6% | 17.8% |
| Kyrgyzstan                       | 2060 | 73.2% | 81.0% | 79.5% | 59.9% | 54.3% |
| Lao PDR                          | 2019 | 24.1% | 25.1% | 31.9% | 20.9% | 15.0% |
| Lao PDR                          | 2060 | 82.4% | 78.9% | 79.0% | 95.7% | 88.9% |
| Latvia                           | 2019 | 52.8% | 64.6% | 57.4% | 26.1% | 19.4% |
| Latvia                           | 2060 | 69.5% | 85.9% | 64.8% | 60.3% | 39.7% |
| Lebanon                          | 2019 | 62.0% | 72.7% | 74.4% | 43.1% | 36.0% |
| Lebanon                          | 2060 | 89.4% | 94.6% | 91.0% | 83.7% | 69.5% |
| Lesotho                          | 2019 | 32.5% | 23.9% | 59.6% | 7.6%  | 31.6% |
| Lesotho                          | 2060 | 80.6% | 64.9% | 91.3% | 72.9% | 98.0% |
| Liberia                          | 2019 | 23.4% | 27.0% | 43.6% | 7.4%  | 17.2% |
| Liberia                          | 2060 | 64.8% | 64.8% | 81.2% | 43.5% | 59.8% |
| Libya                            | 2019 | 59.5% | 68.9% | 74.9% | 39.0% | 36.3% |
| Libya                            | 2060 | 88.5% | 92.9% | 91.3% | 81.6% | 72.2% |
| Lithuania                        | 2019 | 55.5% | 67.3% | 60.3% | 26.5% | 19.9% |
| Lithuania                        | 2060 | 74.9% | 89.0% | 71.2% | 67.2% | 46.5% |
| Luxembourg                       | 2019 | 56.0% | 71.9% | 54.3% | 32.1% | 26.9% |
| Luxembourg                       | 2060 | 77.0% | 93.8% | 73.8% | 56.1% | 41.9% |
| Macedonia (TFYR)                 | 2019 | 54.6% | 69.3% | 54.4% | 34.9% | 23.6% |
| Macedonia (TFYR)                 | 2060 | 79.2% | 89.8% | 69.8% | 83.5% | 69.8% |
| Madagascar                       | 2019 | 19.8% | 19.9% | 33.3% | 10.1% | 16.6% |
| Madagascar                       | 2060 | 67.4% | 52.3% | 76.6% | 71.2% | 72.3% |
| Malawi                           | 2019 | 19.4% | 17.0% | 35.8% | 7.8%  | 18.8% |
| Malawi                           | 2060 | 66.7% | 43.6% | 81.3% | 62.4% | 83.3% |
| Malaysia                         | 2019 | 44.3% | 48.3% | 49.7% | 38.6% | 30.1% |
| Malaysia                         | 2060 | 93.9% | 95.4% | 92.5% | 95.0% | 92.2% |
| Maldives                         | 2019 | 30.0% | 29.7% | 38.8% | 25.1% | 18.4% |
| Maldives                         | 2060 | 86.2% | 81.4% | 88.5% | 95.5% | 93.3% |
| Mali                             | 2019 | 21.1% | 23.0% | 40.2% | 8.4%  | 18.6% |
| Mali                             | 2060 | 75.3% | 65.2% | 86.9% | 66.6% | 82.3% |
| Malta                            | 2019 | 63.9% | 77.0% | 62.5% | 42.8% | 35.4% |
| Malta                            | 2060 | 78.7% | 93.8% | 74.5% | 58.9% | 46.6% |
| Mauritania                       | 2019 | 29.1% | 31.1% | 50.2% | 12.2% | 23.1% |
| Mauritania                       | 2060 | 83.3% | 79.4% | 91.7% | 76.9% | 82.8% |
| Mauritius                        | 2019 | 31.1% | 27.7% | 43.5% | 13.2% | 21.1% |
| Mauritius                        | 2060 | 64.6% | 55.3% | 73.1% | 63.2% | 66.3% |
| Mexico                           | 2019 | 59.8% | 69.4% | 70.6% | 41.4% | 39.8% |
| Mexico                           | 2060 | 88.9% | 93.8% | 90.3% | 80.0% | 76.0% |
| Micronesia (Federated States of) | 2019 | 70.8% | 76.7% | 83.7% | 53.0% | 62.5% |
| Micronesia (Federated States of) | 2060 | 95.9% | 94.9% | 95.9% | 96.9% | 97.0% |
| Moldova                          | 2019 | 48.3% | 58.0% | 53.9% | 22.5% | 17.6% |
| Moldova                          | 2060 | 74.8% | 84.9% | 70.2% | 71.7% | 56.7% |
| Mongolia                         | 2019 | 44.4% | 58.9% | 59.1% | 18.6% | 21.3% |
| Mongolia                         | 2060 | 78.8% | 90.7% | 85.5% | 59.6% | 54.2% |
| Montenegro                       | 2019 | 57.1% | 72.5% | 58.5% | 37.8% | 25.2% |
| Montenegro                       | 2060 | 89.5% | 95.5% | 83.9% | 92.8% | 84.3% |
| Morocco                          | 2019 | 54.3% | 61.8% | 69.5% | 33.4% | 33.0% |
| Morocco                          | 2060 | 91.7% | 93.3% | 93.0% | 88.8% | 85.5% |
| Mozambique                       | 2019 | 23.0% | 21.5% | 39.5% | 10.6% | 22.5% |
| Mozambique                       | 2060 | 72.5% | 57.6% | 84.2% | 66.7% | 81.8% |
| Myanmar                          | 2019 | 23.0% | 23.5% | 31.1% | 17.0% | 12.2% |
| Myanmar                          | 2060 | 75.7% | 68.1% | 77.9% | 89.7% | 77.1% |
| Namibia                          | 2019 | 32.5% | 30.1% | 56.9% | 12.1% | 26.0% |
| Namibia                          | 2060 | 86.6% | 78.4% | 88.7% | 88.2% | 96.2% |
| Nepal                            | 2019 | 18.5% | 22.2% | 26.5% | 9.4%  | 9.7%  |
| Nepal                            | 2060 | 69.4% | 64.6% | 71.2% | 74.7% | 74.9% |
| Netherlands                      | 2019 | 55.5% | 70.9% | 55.1% | 30.7% | 27.7% |
| Netherlands                      | 2060 | 83.4% | 95.5% | 80.7% | 69.4% | 57.2% |
| New Zealand                      | 2019 | 63.1% | 75.8% | 65.0% | 43.8% | 41.5% |
| New Zealand                      | 2060 | 87.0% | 95.4% | 87.7% | 74.1% | 66.0% |
| Nicaragua                        | 2019 | 51.4% | 59.9% | 65.9% | 30.4% | 36.4% |



|                                  |      |       |       |       |       |       |
|----------------------------------|------|-------|-------|-------|-------|-------|
| Nicaragua                        | 2060 | 87.2% | 91.0% | 89.3% | 76.0% | 79.3% |
| Niger                            | 2019 | 15.8% | 16.5% | 33.6% | 6.0%  | 13.7% |
| Niger                            | 2060 | 62.4% | 43.0% | 79.0% | 55.9% | 72.4% |
| Nigeria                          | 2019 | 20.9% | 24.9% | 41.5% | 8.1%  | 13.1% |
| Nigeria                          | 2060 | 74.7% | 69.9% | 87.9% | 68.1% | 70.2% |
| North Korea                      | 2019 | 32.6% | 37.6% | 33.0% | 31.9% | 19.2% |
| North Korea                      | 2060 | 64.3% | 71.2% | 53.0% | 82.5% | 63.5% |
| Norway                           | 2019 | 55.8% | 70.6% | 55.4% | 34.2% | 29.6% |
| Norway                           | 2060 | 80.6% | 94.1% | 77.3% | 66.0% | 53.4% |
| Occupied Palestinian Territory   | 2019 | 54.9% | 69.4% | 74.3% | 37.4% | 36.9% |
| Occupied Palestinian Territory   | 2060 | 88.8% | 93.6% | 91.6% | 84.0% | 77.2% |
| Oman                             | 2019 | 62.1% | 68.3% | 73.3% | 43.7% | 38.8% |
| Oman                             | 2060 | 94.9% | 96.7% | 95.4% | 92.6% | 87.3% |
| Pakistan                         | 2019 | 23.2% | 29.3% | 35.5% | 12.8% | 11.1% |
| Pakistan                         | 2060 | 75.8% | 72.2% | 79.1% | 75.3% | 77.2% |
| Panama                           | 2019 | 53.9% | 62.3% | 66.6% | 31.8% | 37.0% |
| Panama                           | 2060 | 89.2% | 93.4% | 90.8% | 79.3% | 81.1% |
| Papua New Guinea                 | 2019 | 47.8% | 51.9% | 63.2% | 30.2% | 42.8% |
| Papua New Guinea                 | 2060 | 87.4% | 85.5% | 89.7% | 85.3% | 89.3% |
| Paraguay                         | 2019 | 49.4% | 59.7% | 59.1% | 34.8% | 31.9% |
| Paraguay                         | 2060 | 89.7% | 92.9% | 89.6% | 88.6% | 82.0% |
| Peru                             | 2019 | 51.4% | 59.7% | 64.1% | 29.5% | 30.9% |
| Peru                             | 2060 | 81.7% | 88.6% | 85.0% | 66.9% | 61.3% |
| Philippines                      | 2019 | 25.7% | 30.5% | 33.6% | 18.6% | 13.8% |
| Philippines                      | 2060 | 74.2% | 72.9% | 73.8% | 80.3% | 72.6% |
| Poland                           | 2019 | 54.8% | 69.5% | 53.8% | 34.6% | 22.1% |
| Poland                           | 2060 | 76.9% | 89.5% | 66.7% | 83.0% | 62.9% |
| Portugal                         | 2019 | 58.3% | 68.7% | 57.1% | 41.2% | 38.3% |
| Portugal                         | 2060 | 87.5% | 94.8% | 83.4% | 81.4% | 78.9% |
| Puerto Rico                      | 2019 | 68.7% | 73.1% | 77.3% | 47.8% | 43.7% |
| Puerto Rico                      | 2060 | 93.7% | 96.7% | 94.2% | 86.5% | 78.1% |
| Qatar                            | 2019 | 69.5% | 75.1% | 76.6% | 45.1% | 38.1% |
| Qatar                            | 2060 | 89.3% | 94.2% | 89.2% | 76.6% | 59.3% |
| Romania                          | 2019 | 54.5% | 68.8% | 54.6% | 33.3% | 22.8% |
| Romania                          | 2060 | 81.5% | 91.3% | 72.8% | 87.5% | 72.9% |
| Russian Federation               | 2019 | 51.2% | 61.5% | 58.5% | 25.6% | 18.7% |
| Russian Federation               | 2060 | 68.5% | 84.5% | 65.6% | 60.7% | 37.3% |
| Rwanda                           | 2019 | 21.2% | 17.5% | 38.1% | 7.0%  | 21.6% |
| Rwanda                           | 2060 | 72.1% | 53.1% | 86.3% | 64.0% | 88.0% |
| Saint Lucia                      | 2019 | 46.7% | 44.5% | 61.7% | 26.6% | 28.8% |
| Saint Lucia                      | 2060 | 85.9% | 83.2% | 89.4% | 83.1% | 83.1% |
| Saint Vincent and the Grenadines | 2019 | 52.8% | 54.7% | 67.0% | 34.8% | 34.7% |
| Saint Vincent and the Grenadines | 2060 | 91.9% | 92.8% | 92.9% | 89.8% | 86.4% |
| Samoa                            | 2019 | 71.6% | 78.7% | 85.9% | 55.3% | 64.7% |
| Samoa                            | 2060 | 96.9% | 95.8% | 96.8% | 98.0% | 98.3% |
| Sao Tome and Principe            | 2019 | 28.0% | 33.1% | 48.2% | 12.7% | 21.2% |
| Sao Tome and Principe            | 2060 | 83.1% | 83.4% | 89.8% | 78.2% | 76.7% |
| Saudi Arabia                     | 2019 | 65.2% | 74.7% | 77.6% | 45.1% | 38.4% |
| Saudi Arabia                     | 2060 | 93.1% | 96.4% | 94.1% | 89.6% | 79.4% |
| Senegal                          | 2019 | 20.8% | 22.1% | 40.1% | 6.8%  | 15.8% |
| Senegal                          | 2060 | 60.7% | 53.3% | 78.5% | 43.7% | 61.2% |
| Serbia                           | 2019 | 54.8% | 68.3% | 54.1% | 38.1% | 25.6% |
| Serbia                           | 2060 | 82.1% | 90.5% | 72.9% | 89.0% | 79.5% |
| Seychelles                       | 2019 | 36.2% | 31.9% | 49.0% | 25.4% | 28.6% |
| Seychelles                       | 2060 | 74.9% | 67.4% | 79.6% | 80.9% | 76.8% |
| Sierra Leone                     | 2019 | 21.8% | 21.8% | 40.6% | 7.7%  | 18.4% |
| Sierra Leone                     | 2060 | 67.2% | 57.1% | 81.8% | 52.9% | 73.0% |
| Singapore                        | 2019 | 32.1% | 39.1% | 28.4% | 27.8% | 18.0% |
| Singapore                        | 2060 | 44.8% | 62.7% | 31.9% | 33.5% | 18.9% |
| Slovakia                         | 2019 | 53.3% | 68.4% | 52.4% | 31.7% | 21.3% |
| Slovakia                         | 2060 | 78.6% | 89.1% | 68.5% | 85.5% | 71.6% |
| Slovenia                         | 2019 | 54.2% | 66.6% | 53.3% | 35.1% | 26.2% |
| Slovenia                         | 2060 | 79.6% | 88.2% | 70.3% | 85.8% | 76.7% |
| Solomon Islands                  | 2019 | 43.6% | 54.3% | 65.7% | 20.2% | 35.2% |
| Solomon Islands                  | 2060 | 87.9% | 90.0% | 91.8% | 80.3% | 86.6% |
| Somalia                          | 2019 | 22.5% | 22.8% | 40.1% | 10.6% | 21.1% |
| Somalia                          | 2060 | 71.3% | 54.9% | 80.1% | 71.1% | 80.1% |
| South Africa                     | 2019 | 47.2% | 45.3% | 70.0% | 24.6% | 33.4% |
| South Africa                     | 2060 | 91.5% | 87.7% | 90.1% | 98.8% | 97.8% |
| South Korea                      | 2019 | 35.0% | 39.7% | 31.0% | 40.5% | 25.4% |
| South Korea                      | 2060 | 67.9% | 76.9% | 57.0% | 83.1% | 66.3% |



|                          |      |       |       |       |       |       |
|--------------------------|------|-------|-------|-------|-------|-------|
| Spain                    | 2019 | 60.3% | 73.9% | 58.3% | 41.4% | 33.0% |
| Spain                    | 2060 | 80.2% | 93.3% | 75.0% | 67.7% | 56.2% |
| Sri Lanka                | 2019 | 22.8% | 20.6% | 30.5% | 17.4% | 14.8% |
| Sri Lanka                | 2060 | 72.2% | 58.4% | 74.4% | 89.9% | 90.1% |
| Sudan                    | 2019 | 24.0% | 23.3% | 41.6% | 10.5% | 21.3% |
| Sudan                    | 2060 | 72.4% | 56.8% | 82.2% | 71.2% | 82.6% |
| Suriname                 | 2019 | 54.3% | 59.6% | 69.5% | 37.0% | 34.4% |
| Suriname                 | 2060 | 86.7% | 91.0% | 89.7% | 80.6% | 71.1% |
| Swaziland                | 2019 | 32.0% | 25.7% | 58.6% | 10.3% | 30.9% |
| Swaziland                | 2060 | 81.3% | 64.5% | 88.4% | 84.0% | 96.8% |
| Sweden                   | 2019 | 52.3% | 69.1% | 51.3% | 28.1% | 23.3% |
| Sweden                   | 2060 | 71.4% | 91.6% | 68.1% | 47.7% | 32.5% |
| Switzerland              | 2019 | 54.0% | 69.9% | 51.7% | 29.3% | 25.2% |
| Switzerland              | 2060 | 80.7% | 94.5% | 77.7% | 64.2% | 52.5% |
| Syrian Arab Republic     | 2019 | 52.7% | 61.9% | 69.8% | 33.8% | 32.4% |
| Syrian Arab Republic     | 2060 | 89.5% | 91.7% | 91.1% | 86.8% | 81.5% |
| Taiwan                   | 2019 | 40.6% | 45.7% | 38.7% | 41.8% | 25.2% |
| Taiwan                   | 2060 | 79.2% | 85.2% | 70.5% | 93.1% | 81.9% |
| Tajikistan               | 2019 | 33.0% | 46.5% | 48.5% | 15.1% | 16.5% |
| Tajikistan               | 2060 | 67.5% | 74.8% | 75.6% | 54.5% | 53.1% |
| Tanzania                 | 2019 | 22.3% | 22.1% | 40.2% | 9.6%  | 20.3% |
| Tanzania                 | 2060 | 74.5% | 58.3% | 85.6% | 70.9% | 84.8% |
| Thailand                 | 2019 | 34.4% | 31.9% | 40.1% | 31.8% | 25.0% |
| Thailand                 | 2060 | 87.4% | 82.6% | 89.3% | 94.9% | 93.1% |
| Timor-Leste              | 2019 | 20.4% | 21.3% | 27.7% | 18.5% | 13.6% |
| Timor-Leste              | 2060 | 75.5% | 67.9% | 70.8% | 92.1% | 84.6% |
| Togo                     | 2019 | 21.7% | 22.3% | 40.4% | 8.1%  | 17.2% |
| Togo                     | 2060 | 69.3% | 57.3% | 83.6% | 60.9% | 73.8% |
| Tonga                    | 2019 | 75.0% | 79.7% | 86.1% | 61.0% | 70.3% |
| Tonga                    | 2060 | 97.2% | 96.3% | 96.9% | 98.2% | 98.3% |
| Trinidad and Tobago      | 2019 | 45.4% | 41.6% | 59.9% | 29.7% | 30.5% |
| Trinidad and Tobago      | 2060 | 88.9% | 83.8% | 91.9% | 92.5% | 92.7% |
| Tunisia                  | 2019 | 55.8% | 62.9% | 71.4% | 29.2% | 31.2% |
| Tunisia                  | 2060 | 90.8% | 93.2% | 92.4% | 86.5% | 82.0% |
| Turkey                   | 2019 | 61.4% | 70.4% | 75.7% | 38.1% | 35.7% |
| Turkey                   | 2060 | 94.2% | 96.2% | 95.1% | 91.4% | 86.0% |
| Turkmenistan             | 2019 | 40.9% | 54.8% | 54.2% | 19.3% | 19.6% |
| Turkmenistan             | 2060 | 74.2% | 84.1% | 80.3% | 58.7% | 50.9% |
| Uganda                   | 2019 | 18.1% | 15.5% | 34.8% | 5.6%  | 19.9% |
| Uganda                   | 2060 | 62.6% | 39.6% | 79.3% | 50.0% | 84.9% |
| Ukraine                  | 2019 | 53.9% | 65.4% | 58.6% | 27.0% | 19.9% |
| Ukraine                  | 2060 | 74.0% | 88.2% | 69.3% | 67.6% | 46.2% |
| United Arab Emirates     | 2019 | 64.5% | 69.6% | 73.7% | 39.6% | 35.1% |
| United Arab Emirates     | 2060 | 85.2% | 91.2% | 87.4% | 74.5% | 60.6% |
| United Kingdom           | 2019 | 60.7% | 73.4% | 63.1% | 35.7% | 35.9% |
| United Kingdom           | 2060 | 84.8% | 94.7% | 87.1% | 65.4% | 57.7% |
| United States of America | 2019 | 66.7% | 78.1% | 68.4% | 50.1% | 45.0% |
| United States of America | 2060 | 90.7% | 96.7% | 91.7% | 82.3% | 73.9% |
| Uruguay                  | 2019 | 58.2% | 69.3% | 64.5% | 38.5% | 32.9% |
| Uruguay                  | 2060 | 82.0% | 92.2% | 83.0% | 70.3% | 52.4% |
| Uzbekistan               | 2019 | 39.3% | 50.7% | 52.0% | 18.0% | 18.5% |
| Uzbekistan               | 2060 | 74.3% | 80.7% | 79.3% | 60.4% | 55.2% |
| Vanuatu                  | 2019 | 49.7% | 57.5% | 67.6% | 29.4% | 42.8% |
| Vanuatu                  | 2060 | 90.5% | 91.3% | 92.7% | 86.7% | 89.5% |
| Venezuela                | 2019 | 57.6% | 68.9% | 68.5% | 37.2% | 38.7% |
| Venezuela                | 2060 | 83.8% | 92.5% | 85.9% | 68.6% | 65.3% |
| Viet Nam                 | 2019 | 17.5% | 17.3% | 22.6% | 14.5% | 8.8%  |
| Viet Nam                 | 2060 | 65.4% | 62.7% | 59.5% | 94.5% | 65.2% |
| Yemen                    | 2019 | 39.8% | 48.7% | 59.0% | 25.0% | 26.5% |
| Yemen                    | 2060 | 91.4% | 90.0% | 92.0% | 92.3% | 92.1% |
| Zambia                   | 2019 | 21.4% | 20.7% | 39.1% | 9.8%  | 19.1% |
| Zambia                   | 2060 | 60.0% | 43.5% | 72.2% | 58.6% | 66.3% |
| Zimbabwe                 | 2019 | 30.6% | 26.4% | 59.6% | 8.2%  | 28.2% |
| Zimbabwe                 | 2060 | 77.6% | 63.5% | 88.4% | 65.4% | 94.6% |

**Table 4: Economic impacts of overweight and obesity, baseline projections for 2020, 2030 and 2060 (in 2019 PPP), by country income group**

|                     | Direct medical costs (PPP billions) | Direct non-medical costs (PPP billions) | Total direct costs (PPP billions) | Absent-eeism costs (PPP billions) | Present-eeism costs (PPP billions) | Premature mortality costs (PPP billions) | Total indirect costs (PPP billions) | Total costs (PPP billions) | Total costs per capita (PPP) | Total costs as a percent of GDP |
|---------------------|-------------------------------------|-----------------------------------------|-----------------------------------|-----------------------------------|------------------------------------|------------------------------------------|-------------------------------------|----------------------------|------------------------------|---------------------------------|
| Low-income          | ..                                  | ..                                      | ..                                | ..                                | ..                                 | ..                                       | ..                                  | ..                         | ..                           | ..                              |
| 2020                | 1.44                                | 0.05                                    | 1.49                              | 1.64                              | 2.54                               | 3.81                                     | 7.99                                | 9.48                       | 17.77                        | 0.94%                           |
| 2030                | 3.08                                | 0.10                                    | 3.18                              | 2.91                              | 4.62                               | 8.10                                     | 15.64                               | 18.81                      | 27.26                        | 1.09%                           |
| 2060                | 21.46                               | 0.41                                    | 21.87                             | 12.30                             | 20.97                              | 61.37                                    | 94.64                               | 116.51                     | 94.57                        | 1.47%                           |
| Lower middle income | ..                                  | ..                                      | ..                                | ..                                | ..                                 | ..                                       | ..                                  | ..                         | ..                           | ..                              |
| 2020                | 30.58                               | 0.25                                    | 30.83                             | 15.32                             | 42.78                              | 190.34                                   | 248.44                              | 279.28                     | 94.89                        | 1.44%                           |
| 2030                | 57.89                               | 0.40                                    | 58.28                             | 26.56                             | 75.08                              | 443.76                                   | 545.40                              | 603.68                     | 180.92                       | 1.77%                           |
| 2060                | 313.14                              | 1.08                                    | 314.22                            | 110.11                            | 314.91                             | 4,103.73                                 | 4,528.75                            | 4,842.97                   | 1,135.62                     | 2.69%                           |
| Upper-middle income | ..                                  | ..                                      | ..                                | ..                                | ..                                 | ..                                       | ..                                  | ..                         | ..                           | ..                              |
| 2020                | 161.91                              | 0.53                                    | 162.44                            | 54.99                             | 144.44                             | 616.76                                   | 816.19                              | 978.63                     | 340.82                       | 2.02%                           |
| 2030                | 284.95                              | 0.70                                    | 285.65                            | 86.57                             | 236.27                             | 1,524.85                                 | 1,847.69                            | 2,133.33                   | 711.48                       | 2.75%                           |
| 2060                | 1,159.95                            | 1.07                                    | 1,161.02                          | 271.37                            | 766.38                             | 18,777.23                                | 19,814.98                           | 20,976.00                  | 6,965.53                     | 3.27%                           |
| High-income         | ..                                  | ..                                      | ..                                | ..                                | ..                                 | ..                                       | ..                                  | ..                         | ..                           | ..                              |
| 2020                | 566.72                              | 0.20                                    | 566.92                            | 111.38                            | 214.40                             | 650.21                                   | 976.00                              | 1,542.92                   | 1,284.39                     | 2.61%                           |
| 2030                | 734.52                              | 0.22                                    | 734.74                            | 138.05                            | 263.79                             | 1,028.71                                 | 1,430.54                            | 2,165.28                   | 1,758.67                     | 2.85%                           |
| 2060                | 1,424.45                            | 0.28                                    | 1,424.73                          | 268.37                            | 489.36                             | 4,327.88                                 | 5,085.61                            | 6,510.34                   | 5,230.91                     | 3.85%                           |

**Table 5: Economic impacts of overweight and obesity, baseline projections for 2020, 2030 and 2060 (in 2019 PPP), by WHO region**

|      | Direct medical costs (PPP billions) | Direct non-medical costs (PPP billions) | Total direct costs (PPP billions) | Absent-eeism costs (PPP billions) | Present-eeism costs (PPP billions) | Premature mortality costs (PPP billions) | Total indirect costs (PPP billions) | Total costs (PPP billions) | Total costs per capita (PPP) | Total costs as a percent of GDP |
|------|-------------------------------------|-----------------------------------------|-----------------------------------|-----------------------------------|------------------------------------|------------------------------------------|-------------------------------------|----------------------------|------------------------------|---------------------------------|
| AFR  | ..                                  | ..                                      | ..                                | ..                                | ..                                 | ..                                       | ..                                  | ..                         | ..                           | ..                              |
| 2020 | 10.71                               | 0.11                                    | 10.82                             | 7.16                              | 12.10                              | 25.27                                    | 44.53                               | 55.35                      | 50.31                        | 1.19%                           |
| 2030 | 19.37                               | 0.20                                    | 19.57                             | 11.07                             | 18.90                              | 47.67                                    | 77.64                               | 97.22                      | 69.35                        | 1.42%                           |
| 2060 | 87.82                               | 0.75                                    | 88.57                             | 30.40                             | 53.09                              | 308.71                                   | 392.20                              | 480.76                     | 194.31                       | 2.07%                           |
| EMR  | ..                                  | ..                                      | ..                                | ..                                | ..                                 | ..                                       | ..                                  | ..                         | ..                           | ..                              |
| 2020 | 32.00                               | 0.07                                    | 32.07                             | 9.09                              | 30.61                              | 101.66                                   | 141.36                              | 173.43                     | 278.49                       | 2.22%                           |
| 2030 | 46.94                               | 0.10                                    | 47.05                             | 12.46                             | 42.25                              | 201.58                                   | 256.30                              | 303.34                     | 418.29                       | 2.64%                           |
| 2060 | 116.96                              | 0.23                                    | 117.19                            | 27.71                             | 95.83                              | 1,473.17                                 | 1,596.70                            | 1,713.89                   | 1,755.37                     | 4.76%                           |
| EUR  | ..                                  | ..                                      | ..                                | ..                                | ..                                 | ..                                       | ..                                  | ..                         | ..                           | ..                              |
| 2020 | 209.78                              | 0.21                                    | 209.98                            | 88.63                             | 93.57                              | 387.43                                   | 569.63                              | 779.62                     | 835.84                       | 2.40%                           |
| 2030 | 263.40                              | 0.23                                    | 263.63                            | 111.93                            | 121.42                             | 575.02                                   | 808.37                              | 1,072.00                   | 1,137.32                     | 2.60%                           |
| 2060 | 479.05                              | 0.28                                    | 479.33                            | 254.25                            | 296.82                             | 1,921.98                                 | 2,473.04                            | 2,952.37                   | 3,194.48                     | 3.33%                           |
| AMR  | ..                                  | ..                                      | ..                                | ..                                | ..                                 | ..                                       | ..                                  | ..                         | ..                           | ..                              |
| 2020 | 385.67                              | 0.19                                    | 385.86                            | 35.20                             | 130.25                             | 416.93                                   | 582.37                              | 968.23                     | 991.67                       | 3.06%                           |
| 2030 | 513.16                              | 0.23                                    | 513.39                            | 43.71                             | 155.10                             | 669.18                                   | 867.99                              | 1,381.39                   | 1,321.75                     | 3.35%                           |
| 2060 | 1,049.08                            | 0.34                                    | 1,049.42                          | 70.69                             | 236.21                             | 2,658.06                                 | 2,964.95                            | 4,014.36                   | 3,479.98                     | 4.43%                           |
| SEAR | ..                                  | ..                                      | ..                                | ..                                | ..                                 | ..                                       | ..                                  | ..                         | ..                           | ..                              |
| 2020 | 15.82                               | 0.15                                    | 15.97                             | 6.15                              | 22.57                              | 154.99                                   | 183.71                              | 199.68                     | 100.06                       | 1.34%                           |
| 2030 | 34.86                               | 0.24                                    | 35.10                             | 11.92                             | 43.55                              | 411.68                                   | 467.15                              | 502.25                     | 231.56                       | 1.86%                           |
| 2060 | 218.11                              | 0.59                                    | 218.70                            | 56.52                             | 205.56                             | 4,303.91                                 | 4,565.98                            | 4,784.68                   | 2,025.55                     | 3.03%                           |
| WPR  | ..                                  | ..                                      | ..                                | ..                                | ..                                 | ..                                       | ..                                  | ..                         | ..                           | ..                              |
| 2020 | 106.68                              | 0.30                                    | 106.98                            | 37.11                             | 115.06                             | 374.85                                   | 527.02                              | 634.00                     | 329.91                       | 1.73%                           |
| 2030 | 202.69                              | 0.42                                    | 203.11                            | 63.00                             | 198.52                             | 1,100.29                                 | 1,361.81                            | 1,564.92                   | 793.29                       | 2.54%                           |
| 2060 | 967.98                              | 0.66                                    | 968.64                            | 222.59                            | 704.13                             | 16,604.39                                | 17,531.11                           | 18,499.75                  | 9,935.13                     | 3.07%                           |

**Table 6: Upper and lower bound estimates of economic impacts of overweight and obesity projections, by country income group**

|              | Cost per capita | Cost as percent of GDP | Cost per capita (lower bound) | Cost as percent of GDP (lower bound) | Cost per capita (upper bound) | Cost as percent of GDP (upper bound) |
|--------------|-----------------|------------------------|-------------------------------|--------------------------------------|-------------------------------|--------------------------------------|
| Low          | ..              | ..                     | ..                            | ..                                   | ..                            | ..                                   |
| 2019         | 6.15            | 0.9%                   | 4.38                          | 0.6%                                 | 7.97                          | 1.1%                                 |
| 2020         | 6.38            | 0.9%                   | 4.55                          | 0.7%                                 | 8.26                          | 1.2%                                 |
| 2030         | 9.63            | 1.0%                   | 7.12                          | 0.8%                                 | 12.20                         | 1.3%                                 |
| 2060         | 32.05           | 1.4%                   | 26.28                         | 1.1%                                 | 38.05                         | 1.6%                                 |
| Lower middle | ..              | ..                     | ..                            | ..                                   | ..                            | ..                                   |
| 2019         | 27.94           | 1.3%                   | 24.24                         | 1.1%                                 | 31.70                         | 1.4%                                 |
| 2020         | 29.50           | 1.4%                   | 25.65                         | 1.2%                                 | 33.40                         | 1.6%                                 |
| 2030         | 56.13           | 1.7%                   | 50.24                         | 1.6%                                 | 62.11                         | 1.9%                                 |
| 2060         | 350.32          | 2.7%                   | 331.52                        | 2.5%                                 | 369.50                        | 2.8%                                 |
| Upper middle | ..              | ..                     | ..                            | ..                                   | ..                            | ..                                   |
| 2019         | 163.38          | 1.9%                   | 143.04                        | 1.60%                                | 186.36                        | 2.1%                                 |
| 2020         | 173.67          | 2.0%                   | 152.47                        | 1.80%                                | 197.57                        | 2.3%                                 |
| 2030         | 376.40          | 2.8%                   | 343.19                        | 2.50%                                | 412.83                        | 3.0%                                 |
| 2060         | 3,936.29        | 3.2%                   | 3,830.62                      | 3.10%                                | 4,046.75                      | 3.3%                                 |
| High         | ..              | ..                     | ..                            | ..                                   | ..                            | ..                                   |
| 2019         | 1,109.90        | 2.5%                   | 971.58                        | 2.1%                                 | 1,263.38                      | 2.8%                                 |
| 2020         | 1,137.67        | 2.6%                   | 997.33                        | 2.3%                                 | 1,293.53                      | 3.0%                                 |
| 2030         | 1,545.45        | 2.9%                   | 1,378.64                      | 2.6%                                 | 1,734.02                      | 3.2%                                 |
| 2060         | 4,404.59        | 3.8%                   | 4,105.85                      | 3.5%                                 | 4,774.24                      | 4.1%                                 |

**Table 7: Upper and lower bound estimates of economic impacts of overweight and obesity projections, by WHO region**

| Row Labels | Cost per capita | Cost as percent of GDP | Cost per capita (lower bound) | Cost as percent of GDP (lower bound) | Cost per capita (upper bound) | Cost as percent of GDP (upper bound) |
|------------|-----------------|------------------------|-------------------------------|--------------------------------------|-------------------------------|--------------------------------------|
| AFR        | ..              | ..                     | ..                            | ..                                   | ..                            | ..                                   |
| 2019       | 20.15           | 1.1%                   | 15.83                         | 0.9%                                 | 24.55                         | 1.4%                                 |
| 2020       | 20.66           | 1.2%                   | 16.26                         | 0.9%                                 | 25.14                         | 1.5%                                 |
| 2030       | 28.41           | 1.4%                   | 23.04                         | 1.2%                                 | 33.87                         | 1.7%                                 |
| 2060       | 79.04           | 2.1%                   | 70.61                         | 1.9%                                 | 87.62                         | 2.3%                                 |
| EMR        | ..              | ..                     | ..                            | ..                                   | ..                            | ..                                   |
| 2019       | 108.86          | 2.1%                   | 92.78                         | 1.8%                                 | 125.20                        | 2.4%                                 |
| 2020       | 112.43          | 2.3%                   | 96.11                         | 2.0%                                 | 129.03                        | 2.7%                                 |
| 2030       | 168.31          | 2.8%                   | 149.56                        | 2.5%                                 | 187.43                        | 3.1%                                 |
| 2060       | 738.67          | 5.4%                   | 711.72                        | 5.2%                                 | 766.47                        | 5.6%                                 |
| EUR        | ..              | ..                     | ..                            | ..                                   | ..                            | ..                                   |
| 2019       | 541.52          | 2.2%                   | 457.31                        | 1.8%                                 | 616.33                        | 2.5%                                 |
| 2020       | 553.19          | 2.3%                   | 467.37                        | 2.0%                                 | 629.47                        | 2.7%                                 |
| 2030       | 733.38          | 2.5%                   | 629.80                        | 2.1%                                 | 826.30                        | 2.8%                                 |
| 2060       | 1,877.52        | 3.1%                   | 1,670.07                      | 2.7%                                 | 2,069.93                      | 3.4%                                 |
| AMR        | ..              | ..                     | ..                            | ..                                   | ..                            | ..                                   |
| 2019       | 872.33          | 3.0%                   | 787.42                        | 2.7%                                 | 985.24                        | 3.4%                                 |
| 2020       | 891.26          | 3.2%                   | 805.93                        | 2.9%                                 | 1,004.76                      | 3.6%                                 |
| 2030       | 1,172.77        | 3.5%                   | 1,078.32                      | 3.2%                                 | 1,298.64                      | 3.9%                                 |
| 2060       | 2,956.66        | 4.5%                   | 2,826.57                      | 4.3%                                 | 3,128.65                      | 4.7%                                 |
| SEA        | ..              | ..                     | ..                            | ..                                   | ..                            | ..                                   |
| 2019       | 30.15           | 1.2%                   | 27.47                         | 1.1%                                 | 32.87                         | 1.3%                                 |
| 2020       | 32.44           | 1.4%                   | 29.63                         | 1.2%                                 | 35.28                         | 1.5%                                 |
| 2030       | 74.83           | 1.9%                   | 69.85                         | 1.8%                                 | 79.90                         | 2.0%                                 |
| 2060       | 648.65          | 3.1%                   | 627.20                        | 3.0%                                 | 670.73                        | 3.20%                                |
| WPR        | ..              | ..                     | ..                            | ..                                   | ..                            | ..                                   |
| 2019       | 200.13          | 1.6%                   | 171.41                        | 1.4%                                 | 232.61                        | 1.80%                                |
| 2020       | 214.35          | 1.7%                   | 184.28                        | 1.5%                                 | 248.39                        | 2.00%                                |
| 2030       | 498.89          | 2.5%                   | 449.18                        | 2.2%                                 | 555.41                        | 2.80%                                |
| 2060       | 6,054.71        | 3.1%                   | 5,873.37                      | 3.0%                                 | 6,272.29                      | 3.20%                                |

**Table 8: Economic impacts of overweight and obesity in 2019 and 2060 (in 2019 USD), by country**

| Country | Year | Direct | Direct | Total | Absent- | Present- | Premature | Total | Total costs | Total | Total |
|---------|------|--------|--------|-------|---------|----------|-----------|-------|-------------|-------|-------|
|---------|------|--------|--------|-------|---------|----------|-----------|-------|-------------|-------|-------|

|                        |      | medical costs (billions) | non-medical costs (billions) | direct costs (PPP billions) | eeism costs (billions) | eeism costs (billions) | mortality costs (billions) | indirect costs (billions) | (billions) | costs per capita | costs as percent of GDP |
|------------------------|------|--------------------------|------------------------------|-----------------------------|------------------------|------------------------|----------------------------|---------------------------|------------|------------------|-------------------------|
| Afghanistan            | 2019 | 44.1                     | 2.3                          | 46.5                        | 21.3                   | 66.8                   | 162.4                      | 250.5                     | 296.9      | 7.81             | 1.58%                   |
| Afghanistan            | 2060 | 738.9                    | 17.5                         | 756.3                       | 489.5                  | 1,422.2                | 3,124.5                    | 5,036.2                   | 5,792.6    | 81.76            | 4.05%                   |
| Albania                | 2019 | 54.8                     | 0.9                          | 55.7                        | 35.3                   | 48.2                   | 201.3                      | 284.8                     | 340.5      | 118.19           | 2.21%                   |
| Albania                | 2060 | 154.1                    | 1.1                          | 155.2                       | 215.3                  | 293.9                  | 2,468.2                    | 2,977.5                   | 3,132.7    | 1,429.85         | 5.15%                   |
| Algeria                | 2019 | 770.4                    | 3.2                          | 773.7                       | 124.9                  | 462.7                  | 1,708.7                    | 2,296.3                   | 3,070.0    | 71.31            | 1.79%                   |
| Algeria                | 2060 | 3,871.7                  | 8.1                          | 3,879.8                     | 351.7                  | 1,283.2                | 15,366.3                   | 17,001.2                  | 20,881.1   | 321.35           | 4.79%                   |
| Angola                 | 2019 | 63.5                     | 2.6                          | 66.1                        | 116.4                  | 231.8                  | 188.3                      | 536.4                     | 602.5      | 18.93            | 0.71%                   |
| Angola                 | 2060 | 1,264.7                  | 28.8                         | 1,293.5                     | 981.2                  | 1,976.3                | 2,509.6                    | 5,467.1                   | 6,760.6    | 69.45            | 1.45%                   |
| Argentina              | 2019 | 3,301.0                  | 11.5                         | 3,312.5                     | 887.2                  | 912.9                  | 3,637.6                    | 5,437.8                   | 8,750.3    | 195.40           | 1.94%                   |
| Argentina              | 2060 | 10,995.2                 | 20.8                         | 11,016.0                    | 1,885.6                | 1,920.7                | 18,717.6                   | 22,523.9                  | 33,539.8   | 591.44           | 2.91%                   |
| Armenia                | 2019 | 78.8                     | 0.4                          | 79.2                        | 17.6                   | 15.6                   | 234.8                      | 268.1                     | 347.3      | 117.42           | 2.55%                   |
| Armenia                | 2060 | 418.3                    | 0.6                          | 418.9                       | 104.6                  | 93.9                   | 3,897.6                    | 4,096.0                   | 4,514.9    | 1,679.17         | 3.84%                   |
| Australia              | 2019 | 10,591.9                 | 4.6                          | 10,596.6                    | 744.7                  | 5,019.2                | 10,605.8                   | 16,369.8                  | 26,966.3   | 1,069.96         | 1.89%                   |
| Australia              | 2060 | 36,806.4                 | 8.9                          | 36,815.3                    | 6,719.8                | 44,210.5               | 70,273.4                   | 121,203.8                 | 158,019.1  | 4,521.27         | 3.49%                   |
| Austria                | 2019 | 3,096.8                  | 1.2                          | 3,098.0                     | 1,353.2                | 696.3                  | 3,496.1                    | 5,545.6                   | 8,643.6    | 965.21           | 1.94%                   |
| Austria                | 2060 | 7,091.8                  | 1.7                          | 7,093.4                     | 2,218.7                | 1,114.4                | 17,358.8                   | 20,691.9                  | 27,785.4   | 3,095.35         | 2.89%                   |
| Azerbaijan             | 2019 | 100.9                    | 1.1                          | 102.0                       | 115.6                  | 139.6                  | 843.5                      | 1,098.7                   | 1,200.7    | 119.50           | 2.49%                   |
| Azerbaijan             | 2060 | 465.9                    | 2.0                          | 467.9                       | 1,024.3                | 1,238.7                | 12,161.6                   | 14,424.5                  | 14,892.4   | 1,374.84         | 6.66%                   |
| Bahamas, The           | 2019 | 62.1                     | 0.1                          | 62.2                        | 3.4                    | 4.2                    | 171.1                      | 178.7                     | 240.9      | 618.59           | 1.83%                   |
| Bahamas, The           | 2060 | 135.3                    | 0.1                          | 135.4                       | 7.5                    | 9.3                    | 1,272.6                    | 1,289.4                   | 1,424.8    | 3,042.64         | 5.16%                   |
| Bahrain                | 2019 | 129.1                    | 0.1                          | 129.2                       | 87.3                   | 326.9                  | 347.8                      | 762.0                     | 891.2      | 543.02           | 2.31%                   |
| Bahrain                | 2060 | 515.6                    | 0.3                          | 515.9                       | 193.6                  | 701.5                  | 9,670.6                    | 10,565.7                  | 11,081.6   | 4,644.25         | 7.40%                   |
| Bangladesh             | 2019 | 176.5                    | 16.4                         | 192.9                       | 119.4                  | 469.9                  | 1,799.6                    | 2,388.9                   | 2,581.7    | 15.83            | 0.85%                   |
| Bangladesh             | 2060 | 3,220.1                  | 71.6                         | 3,291.6                     | 1,392.6                | 5,305.2                | 48,079.5                   | 54,777.3                  | 58,068.9   | 303.32           | 2.06%                   |
| Barbados               | 2019 | 22.8                     | 0.1                          | 22.9                        | 15.1                   | 12.3                   | 102.6                      | 130.1                     | 153.0      | 532.93           | 2.89%                   |
| Barbados               | 2060 | 59.2                     | 0.1                          | 59.3                        | 30.7                   | 25.0                   | 749.0                      | 804.7                     | 864.0      | 3,265.46         | 9.62%                   |
| Belarus                | 2019 | 258.9                    | 1.4                          | 260.4                       | 101.5                  | 309.4                  | 1,133.1                    | 1,544.1                   | 1,804.4    | 190.90           | 2.80%                   |
| Belarus                | 2060 | 853.4                    | 1.8                          | 855.2                       | 814.9                  | 2,483.1                | 5,230.3                    | 8,528.3                   | 9,383.4    | 1,126.11         | 4.46%                   |
| Belgium                | 2019 | 3,822.0                  | 1.8                          | 3,823.9                     | 1,135.3                | 1,354.2                | 3,327.4                    | 5,817.0                   | 9,640.9    | 835.48           | 1.80%                   |
| Belgium                | 2060 | 7,292.8                  | 2.5                          | 7,295.3                     | 2,106.6                | 2,460.5                | 11,956.2                   | 16,523.3                  | 23,818.5   | 1,947.61         | 2.30%                   |
| Belize                 | 2019 | 7.0                      | 0.1                          | 7.1                         | 5.5                    | 6.8                    | 19.8                       | 32.0                      | 39.1       | 100.15           | 2.01%                   |
| Belize                 | 2060 | 40.9                     | 0.3                          | 41.2                        | 23.3                   | 28.6                   | 388.9                      | 440.9                     | 482.1      | 798.97           | 5.52%                   |
| Benin                  | 2019 | 10.3                     | 0.9                          | 11.3                        | 13.8                   | 28.7                   | 71.3                       | 113.8                     | 125.1      | 10.60            | 0.87%                   |
| Benin                  | 2060 | 157.6                    | 7.1                          | 164.7                       | 89.0                   | 183.8                  | 876.7                      | 1,149.5                   | 1,314.3    | 45.23            | 1.54%                   |
| Bhutan                 | 2019 | 2.6                      | 0.1                          | 2.7                         | 1.5                    | 5.3                    | 17.7                       | 24.5                      | 27.2       | 35.63            | 1.11%                   |
| Bhutan                 | 2060 | 35.6                     | 0.3                          | 35.9                        | 11.7                   | 41.8                   | 767.8                      | 821.3                     | 857.2      | 951.46           | 3.46%                   |
| Bolivia                | 2019 | 166.1                    | 2.2                          | 168.4                       | 342.4                  | 452.4                  | 425.1                      | 1,219.8                   | 1,388.2    | 120.58           | 3.39%                   |
| Bolivia                | 2060 | 874.9                    | 5.7                          | 880.7                       | 1,122.6                | 1,475.1                | 3,316.7                    | 5,914.4                   | 6,795.1    | 405.54           | 4.54%                   |
| Bosnia and Herzegovina | 2019 | 114.1                    | 0.7                          | 114.8                       | 45.0                   | 58.5                   | 382.8                      | 486.4                     | 601.2      | 182.13           | 2.98%                   |
| Bosnia and Herzegovina | 2060 | 325.3                    | 0.8                          | 326.1                       | 100.5                  | 130.5                  | 3,278.4                    | 3,509.4                   | 3,835.5    | 1,572.82         | 5.53%                   |
| Botswana               | 2019 | 56.0                     | 0.3                          | 56.3                        | 15.2                   | 35.2                   | 207.3                      | 257.7                     | 314.0      | 136.29           | 1.88%                   |
| Botswana               | 2060 | 501.3                    | 1.1                          | 502.4                       | 59.9                   | 139.0                  | 5,076.9                    | 5,275.8                   | 5,778.2    | 1,531.67         | 4.91%                   |
| Brazil                 | 2019 | 11,956.9                 | 54.6                         | 12,011.5                    | 2,684.3                | 2,960.6                | 19,492.9                   | 25,137.9                  | 37,149.3   | 176.02           | 1.98%                   |
| Brazil                 | 2060 | 30,255.7                 | 95.1                         | 30,350.8                    | 4,900.8                | 5,305.2                | 177,654.3                  | 187,860.4                 | 218,211.2  | 972.37           | 4.66%                   |
| Brunei Darussalam      | 2019 | 16.5                     | 0.0                          | 16.5                        | 10.1                   | 23.7                   | 81.8                       | 115.7                     | 132.2      | 305.14           | 0.98%                   |
| Brunei Darussalam      | 2060 | 35.3                     | 0.0                          | 35.3                        | 83.5                   | 194.8                  | 1,537.7                    | 1,816.1                   | 1,851.4    | 3,844.18         | 7.82%                   |
| Bulgaria               | 2019 | 368.1                    | 1.9                          | 370.0                       | 142.8                  | 185.6                  | 2,229.0                    | 2,557.4                   | 2,927.4    | 418.20           | 4.25%                   |
| Bulgaria               | 2060 | 1,011.7                  | 1.9                          | 1,013.6                     | 998.7                  | 1,298.9                | 6,864.1                    | 9,161.6                   | 10,175.2   | 2,066.67         | 7.08%                   |
| Burkina Faso           | 2019 | 16.5                     | 1.6                          | 18.0                        | 29.3                   | 42.8                   | 57.3                       | 129.4                     | 147.4      | 7.25             | 0.92%                   |
| Burkina Faso           | 2060 | 504.6                    | 16.5                         | 521.2                       | 171.7                  | 253.7                  | 1,144.1                    | 1,569.5                   | 2,090.6    | 40.09            | 1.77%                   |
| Burundi                | 2019 | 5.5                      | 1.1                          | 6.5                         | 1.7                    | 12.5                   | 4.9                        | 19.0                      | 25.5       | 2.22             | 0.97%                   |
| Burundi                | 2060 | 89.5                     | 10.6                         | 100.1                       | 11.0                   | 81.0                   | 48.3                       | 140.3                     | 240.4      | 7.83             | 2.97%                   |
| Cabo Verde             | 2019 | 4.3                      | 0.1                          | 4.4                         | 2.4                    | 4.7                    | 14.4                       | 21.5                      | 25.9       | 47.03            | 1.31%                   |
| Cabo Verde             | 2060 | 35.0                     | 0.3                          | 35.3                        | 6.1                    | 12.1                   | 334.2                      | 352.4                     | 387.7      | 563.35           | 2.94%                   |
| Cambodia               | 2019 | 41.6                     | 1.5                          | 43.1                        | 30.7                   | 115.1                  | 141.7                      | 287.5                     | 330.6      | 20.05            | 1.22%                   |
| Cambodia               | 2060 | 653.1                    | 7.3                          | 660.4                       | 602.8                  | 2,271.6                | 5,551.0                    | 8,425.5                   | 9,085.9    | 401.33           | 2.88%                   |
| Cameroon               | 2019 | 45.9                     | 3.4                          | 49.3                        | 72.9                   | 148.0                  | 232.2                      | 453.1                     | 502.4      | 19.42            | 1.27%                   |
| Cameroon               | 2060 | 567.1                    | 22.9                         | 590.0                       | 412.3                  | 849.2                  | 1,666.7                    | 2,928.2                   | 3,518.2    | 59.20            | 2.12%                   |
| Canada                 | 2019 | 14,767.5                 | 6.0                          | 14,773.6                    | 5,732.7                | 5,879.2                | 13,952.3                   | 25,564.2                  | 40,337.8   | 1,078.23         | 2.32%                   |
| Canada                 | 2060 | 41,183.2                 | 10.7                         | 41,194.0                    | 11,451.4               | 11,598.7               | 98,103.7                   | 121,153.8                 | 162,347.7  | 3,397.86         | 3.74%                   |
| Central African        | 2019 | 6.2                      | 0.7                          | 6.9                         | 4.9                    | 35.4                   | 7.0                        | 47.3                      | 54.2       | 11.42            | 2.38%                   |

|                          |      |           |       |           |          |           |             |             |              |          |       |
|--------------------------|------|-----------|-------|-----------|----------|-----------|-------------|-------------|--------------|----------|-------|
| Republic                 |      |           |       |           |          |           |             |             |              |          |       |
| Central African Republic | 2060 | 94.5      | 4.4   | 98.9      | 26.7     | 194.0     | 41.8        | 262.6       | 361.5        | 38.07    | 5.24% |
| Chad                     | 2019 | 9.7       | 1.0   | 10.7      | 24.5     | 48.9      | 20.0        | 93.3        | 104.0        | 6.52     | 0.95% |
| Chad                     | 2060 | 107.4     | 9.4   | 116.8     | 179.1    | 358.8     | 261.0       | 798.9       | 915.7        | 22.58    | 1.97% |
| Chile                    | 2019 | 1,975.1   | 3.3   | 1,978.5   | 605.3    | 1,071.6   | 2,559.2     | 4,236.2     | 6,214.6      | 327.91   | 2.23% |
| Chile                    | 2060 | 5,761.6   | 5.0   | 5,766.6   | 1,206.4  | 2,070.1   | 32,910.3    | 36,186.9    | 41,953.5     | 2,089.81 | 3.32% |
| China                    | 2019 | 33,810.6  | 248.9 | 34,059.5  | 12,631.0 | 50,027.4  | 162,790.1   | 225,448.5   | 259,508.0    | 181.00   | 1.81% |
| China                    | 2060 | 482,132.4 | 530.3 | 482,662.7 | 75,120.4 | 297,989.9 | 9,252,564.8 | 9,625,675.2 | 10,108,337.9 | 7,582.97 | 3.06% |
| Colombia                 | 2019 | 1,651.4   | 9.7   | 1,661.2   | 336.1    | 1,106.8   | 2,217.3     | 3,660.2     | 5,321.4      | 105.71   | 1.65% |
| Colombia                 | 2060 | 5,406.0   | 17.3  | 5,423.3   | 661.3    | 2,170.1   | 47,512.1    | 50,343.5    | 55,766.7     | 1,006.48 | 4.39% |
| Comoros                  | 2019 | 1.6       | 0.1   | 1.7       | 1.0      | 2.1       | 4.6         | 7.7         | 9.4          | 11.02    | 0.79% |
| Comoros                  | 2060 | 14.1      | 0.5   | 14.6      | 4.9      | 10.5      | 62.0        | 77.3        | 92.0         | 55.20    | 2.41% |
| Congo, Dem. Rep.         | 2019 | 40.2      | 13.5  | 53.6      | 74.6     | 133.0     | 159.9       | 367.5       | 421.1        | 4.85     | 0.84% |
| Congo, Dem. Rep.         | 2060 | 835.8     | 130.7 | 966.5     | 514.7    | 922.2     | 2,192.2     | 3,629.2     | 4,595.6      | 19.63    | 1.70% |
| Congo, Rep.              | 2019 | 7.2       | 0.8   | 8.0       | 27.3     | 23.5      | 69.8        | 120.5       | 128.5        | 23.88    | 1.00% |
| Congo, Rep.              | 2060 | 72.9      | 5.5   | 78.5      | 189.3    | 163.8     | 314.1       | 667.2       | 745.6        | 58.54    | 2.84% |
| Costa Rica               | 2019 | 353.2     | 1.5   | 354.7     | 197.5    | 158.5     | 498.3       | 854.3       | 1,209.0      | 239.51   | 1.88% |
| Costa Rica               | 2060 | 1,300.6   | 2.7   | 1,303.2   | 441.5    | 344.0     | 9,233.1     | 10,018.7    | 11,321.9     | 1,977.95 | 4.25% |
| Côte d'Ivoire            | 2019 | 56.9      | 2.8   | 59.7      | 36.8     | 81.8      | 237.3       | 355.9       | 415.6        | 16.16    | 0.71% |
| Côte d'Ivoire            | 2060 | 780.1     | 19.6  | 799.7     | 176.6    | 392.6     | 1,869.0     | 2,438.2     | 3,237.8      | 53.15    | 1.25% |
| Croatia                  | 2019 | 293.3     | 0.6   | 293.9     | 176.4    | 148.4     | 1,063.1     | 1,388.0     | 1,681.9      | 407.20   | 2.70% |
| Croatia                  | 2060 | 595.9     | 0.6   | 596.6     | 375.5    | 315.5     | 6,410.7     | 7,101.7     | 7,698.3      | 2,487.15 | 3.50% |
| Cyprus                   | 2019 | 125.1     | 0.2   | 125.3     | 89.6     | 112.0     | 173.6       | 375.2       | 500.5        | 417.60   | 1.94% |
| Cyprus                   | 2060 | 310.7     | 0.3   | 311.0     | 156.5    | 194.0     | 1,569.2     | 1,919.7     | 2,230.7      | 1,637.64 | 2.16% |
| Czech Republic           | 2019 | 1,375.5   | 1.7   | 1,377.2   | 647.2    | 543.3     | 3,687.9     | 4,878.5     | 6,255.6      | 585.23   | 2.48% |
| Czech Republic           | 2060 | 3,620.6   | 2.1   | 3,622.7   | 4,807.3  | 4,035.7   | 18,067.4    | 26,910.4    | 30,533.2     | 2,927.43 | 4.61% |
| Denmark                  | 2019 | 2,320.9   | 0.9   | 2,321.8   | 1,378.3  | 699.4     | 2,272.9     | 4,350.6     | 6,672.4      | 1,156.02 | 1.92% |
| Denmark                  | 2060 | 5,468.0   | 1.3   | 5,469.3   | 2,368.9  | 1,199.4   | 9,733.4     | 13,301.7    | 18,771.0     | 2,953.83 | 2.61% |
| Dominican Republic       | 2019 | 356.2     | 3.2   | 359.4     | 112.0    | 83.3      | 1,454.4     | 1,649.8     | 2,009.2      | 187.09   | 2.26% |
| Dominican Republic       | 2060 | 2,616.9   | 6.5   | 2,623.3   | 340.1    | 246.8     | 18,652.2    | 19,239.2    | 21,862.5     | 1,696.68 | 3.98% |
| Ecuador                  | 2019 | 594.4     | 2.8   | 597.2     | 139.4    | 445.1     | 1,064.7     | 1,649.3     | 2,246.5      | 129.30   | 2.08% |
| Ecuador                  | 2060 | 2,930.3   | 6.8   | 2,937.1   | 430.1    | 1,365.6   | 10,940.2    | 12,735.8    | 15,672.9     | 641.92   | 5.42% |
| Egypt, Arab Rep.         | 2019 | 1,057.9   | 8.9   | 1,066.8   | 260.1    | 1,023.4   | 5,581.1     | 6,864.6     | 7,931.4      | 79.01    | 2.62% |
| Egypt, Arab Rep.         | 2060 | 6,087.8   | 24.9  | 6,112.7   | 735.6    | 2,910.9   | 60,388.4    | 64,034.9    | 70,147.6     | 395.11   | 3.44% |
| El Salvador              | 2019 | 133.9     | 1.5   | 135.4     | 44.3     | 96.3      | 259.8       | 400.4       | 535.8        | 83.03    | 1.99% |
| El Salvador              | 2060 | 486.8     | 2.7   | 489.5     | 95.6     | 207.5     | 1,734.4     | 2,037.5     | 2,527.0      | 372.40   | 4.34% |
| Equatorial Guinea        | 2019 | 11.2      | 0.2   | 11.3      | 2.4      | 4.8       | 29.5        | 36.8        | 48.1         | 35.47    | 0.42% |
| Equatorial Guinea        | 2060 | 262.8     | 1.2   | 264.0     | 15.6     | 31.2      | 155.5       | 202.2       | 466.3        | 142.31   | 2.66% |
| Estonia                  | 2019 | 130.3     | 0.2   | 130.5     | 74.6     | 61.3      | 643.9       | 779.8       | 910.2        | 686.64   | 2.93% |
| Estonia                  | 2060 | 355.6     | 0.2   | 355.8     | 472.9    | 389.2     | 4,244.4     | 5,106.5     | 5,462.3      | 5,004.31 | 3.63% |
| Eswatini                 | 2019 | 12.0      | 0.1   | 12.2      | 2.1      | 7.6       | 46.4        | 56.1        | 68.3         | 59.46    | 1.52% |
| Eswatini                 | 2060 | 110.2     | 0.6   | 110.8     | 7.6      | 27.7      | 590.0       | 625.3       | 736.0        | 394.75   | 4.42% |
| Ethiopia                 | 2019 | 64.3      | 6.4   | 70.7      | 109.0    | 157.3     | 215.3       | 481.6       | 552.3        | 4.93     | 0.58% |
| Ethiopia                 | 2060 | 1,191.5   | 46.4  | 1,237.8   | 714.7    | 1,023.3   | 4,275.0     | 6,013.0     | 7,250.8      | 31.12    | 0.63% |
| Fiji                     | 2019 | 14.1      | 0.2   | 14.3      | 12.1     | 23.8      | 157.3       | 193.3       | 207.5        | 233.18   | 3.78% |
| Fiji                     | 2060 | 58.8      | 0.4   | 59.2      | 90.5     | 178.3     | 713.4       | 982.2       | 1,041.4      | 947.33   | 6.98% |
| Finland                  | 2019 | 1,748.1   | 0.9   | 1,749.1   | 850.5    | 450.4     | 2,350.6     | 3,651.5     | 5,400.6      | 976.22   | 2.01% |
| Finland                  | 2060 | 4,339.5   | 1.3   | 4,340.8   | 1,239.5  | 654.5     | 13,312.1    | 15,206.1    | 19,546.9     | 3,605.30 | 3.26% |
| France                   | 2019 | 21,609.9  | 21.0  | 21,630.9  | 5,282.5  | 7,168.6   | 16,421.5    | 28,872.6    | 50,503.5     | 775.43   | 1.85% |
| France                   | 2060 | 47,441.3  | 29.5  | 47,470.8  | 8,630.7  | 11,592.1  | 64,875.2    | 85,098.0    | 132,568.8    | 1,976.19 | 2.39% |
| Gabon                    | 2019 | 20.4      | 0.4   | 20.7      | 7.5      | 9.9       | 103.5       | 121.0       | 141.7        | 65.22    | 0.84% |
| Gabon                    | 2060 | 135.0     | 1.7   | 136.7     | 35.0     | 46.6      | 559.8       | 641.3       | 778.0        | 179.95   | 1.61% |
| Gambia, The              | 2019 | 1.7       | 0.3   | 2.0       | 1.5      | 3.6       | 7.6         | 12.8        | 14.8         | 6.30     | 0.82% |
| Gambia, The              | 2060 | 27.2      | 2.6   | 29.8      | 11.2     | 26.6      | 109.2       | 146.9       | 176.7        | 30.80    | 2.38% |
| Georgia                  | 2019 | 74.4      | 0.5   | 74.9      | 39.5     | 53.0      | 408.3       | 500.8       | 575.7        | 144.05   | 3.29% |
| Georgia                  | 2060 | 259.5     | 0.7   | 260.2     | 270.2    | 364.1     | 3,914.2     | 4,548.5     | 4,808.7      | 1,447.97 | 3.78% |
| Germany                  | 2019 | 30,994.6  | 22.7  | 31,017.2  | 17,198.5 | 13,027.2  | 40,261.6    | 70,487.4    | 101,504.6    | 1,215.38 | 2.61% |
| Germany                  | 2060 | 62,128.5  | 29.0  | 62,157.5  | 26,069.8 | 19,310.7  | 143,205.6   | 188,586.1   | 250,743.6    | 3,216.24 | 3.52% |
| Ghana                    | 2019 | 74.0      | 3.2   | 77.2      | 146.2    | 127.6     | 520.8       | 794.6       | 871.9        | 28.66    | 1.28% |
| Ghana                    | 2060 | 1,371.8   | 17.9  | 1,389.8   | 601.6    | 528.8     | 9,099.3     | 10,229.8    | 11,619.5     | 197.34   | 2.24% |

|                    |      |          |       |          |          |          |           |           |           |          |       |
|--------------------|------|----------|-------|----------|----------|----------|-----------|-----------|-----------|----------|-------|
| Greece             | 2019 | 1,245.9  | 1.7   | 1,247.7  | 176.5    | 364.5    | 2,475.1   | 3,016.0   | 4,263.7   | 407.10   | 2.08% |
| Greece             | 2060 | 1,575.0  | 1.9   | 1,576.8  | 186.0    | 378.5    | 8,345.0   | 8,909.5   | 10,486.3  | 1,248.34 | 2.68% |
| Guatemala          | 2019 | 289.5    | 3.6   | 293.0    | 78.1     | 287.9    | 541.7     | 907.7     | 1,200.7   | 68.30    | 1.56% |
| Guatemala          | 2060 | 1,656.0  | 10.8  | 1,666.8  | 302.4    | 1,117.9  | 5,118.6   | 6,538.9   | 8,205.7   | 282.05   | 3.07% |
| Guinea             | 2019 | 13.7     | 1.4   | 15.1     | 2.4      | 3.0      | 52.5      | 57.9      | 72.9      | 5.71     | 0.54% |
| Guinea             | 2060 | 254.7    | 10.7  | 265.4    | 14.7     | 18.8     | 652.3     | 685.7     | 951.2     | 31.04    | 1.17% |
| Guinea-Bissau      | 2019 | 2.9      | 0.2   | 3.1      | 3.1      | 6.2      | 5.8       | 15.0      | 18.1      | 9.42     | 1.26% |
| Guinea-Bissau      | 2060 | 40.4     | 1.5   | 41.9     | 18.3     | 37.1     | 49.1      | 104.5     | 146.4     | 35.68    | 2.16% |
| Haiti              | 2019 | 43.2     | 2.3   | 45.5     | 56.6     | 74.6     | 86.5      | 217.7     | 263.2     | 23.37    | 1.78% |
| Haiti              | 2060 | 224.0    | 6.2   | 230.3    | 168.5    | 222.4    | 324.2     | 715.2     | 945.4     | 61.03    | 4.33% |
| Honduras           | 2019 | 111.0    | 2.5   | 113.5    | 44.1     | 151.1    | 205.6     | 400.9     | 514.3     | 52.77    | 2.06% |
| Honduras           | 2060 | 624.4    | 6.8   | 631.2    | 153.4    | 524.0    | 2,027.6   | 2,705.0   | 3,336.2   | 228.90   | 3.44% |
| Hungary            | 2019 | 757.7    | 1.5   | 759.2    | 262.9    | 510.7    | 3,289.3   | 4,062.8   | 4,822.0   | 497.90   | 2.95% |
| Hungary            | 2060 | 1,865.5  | 1.7   | 1,867.2  | 2,135.3  | 4,152.6  | 11,418.2  | 17,706.1  | 19,573.3  | 2,425.13 | 4.77% |
| Iceland            | 2019 | 145.2    | 0.1   | 145.2    | 115.9    | 64.9     | 141.5     | 322.3     | 467.5     | 1,379.03 | 1.88% |
| Iceland            | 2060 | 428.7    | 0.1   | 428.8    | 193.8    | 108.1    | 1,157.8   | 1,459.8   | 1,888.6   | 5,017.01 | 2.44% |
| India              | 2019 | 2,251.0  | 83.9  | 2,334.9  | 860.4    | 3,479.8  | 22,273.3  | 26,613.6  | 28,948.5  | 21.19    | 1.02% |
| India              | 2060 | 42,656.9 | 375.6 | 43,032.4 | 6,995.0  | 28,944.2 | 759,629.0 | 795,568.2 | 838,600.6 | 507.93   | 2.47% |
| Indonesia          | 2019 | 1,162.7  | 24.9  | 1,187.5  | 442.7    | 1,410.2  | 14,431.3  | 16,284.2  | 17,471.8  | 64.56    | 1.56% |
| Indonesia          | 2060 | 13,811.2 | 93.7  | 13,904.9 | 6,515.4  | 20,795.7 | 353,179.9 | 380,490.9 | 394,395.9 | 1,172.25 | 4.70% |
| Iran, Islamic Rep. | 2019 | 1,624.7  | 5.9   | 1,630.6  | 141.7    | 527.9    | 2,459.5   | 3,129.1   | 4,759.7   | 57.41    | 1.63% |
| Iran, Islamic Rep. | 2060 | 5,541.6  | 12.3  | 5,553.8  | 325.8    | 1,118.1  | 35,675.9  | 37,119.9  | 42,673.7  | 405.59   | 5.52% |
| Iraq               | 2019 | 633.5    | 8.2   | 641.7    | 115.4    | 401.2    | 2,259.3   | 2,775.9   | 3,417.7   | 86.94    | 1.46% |
| Iraq               | 2060 | 3,837.9  | 27.2  | 3,865.1  | 397.9    | 1,369.2  | 18,174.9  | 19,941.9  | 23,807.0  | 294.96   | 2.59% |
| Ireland            | 2019 | 1,998.0  | 0.7   | 1,998.8  | 915.4    | 485.9    | 3,207.3   | 4,608.6   | 6,607.4   | 1,353.27 | 1.66% |
| Ireland            | 2060 | 7,896.1  | 1.3   | 7,897.5  | 2,625.0  | 1,348.0  | 38,473.2  | 42,446.2  | 50,343.7  | 8,772.61 | 2.07% |
| Israel             | 2019 | 2,132.5  | 1.7   | 2,134.1  | 1,068.1  | 857.8    | 2,510.2   | 4,436.2   | 6,570.3   | 771.22   | 1.65% |
| Israel             | 2060 | 7,834.4  | 3.6   | 7,837.9  | 3,218.0  | 2,513.9  | 23,923.8  | 29,655.7  | 37,493.6  | 2,671.57 | 1.87% |
| Italy              | 2019 | 12,770.2 | 23.0  | 12,793.2 | 3,960.1  | 4,209.0  | 16,246.8  | 24,416.0  | 37,209.2  | 614.52   | 1.85% |
| Italy              | 2060 | 17,898.3 | 25.8  | 17,924.1 | 5,057.5  | 4,956.1  | 52,097.5  | 62,111.1  | 80,035.2  | 1,583.07 | 2.52% |
| Jamaica            | 2019 | 63.3     | 0.9   | 64.2     | 79.0     | 87.9     | 194.2     | 361.1     | 425.3     | 144.25   | 2.69% |
| Jamaica            | 2060 | 159.9    | 1.5   | 161.4    | 150.4    | 166.1    | 1,048.7   | 1,365.2   | 1,526.6   | 543.68   | 5.85% |
| Japan              | 2019 | 18,834.0 | 7.6   | 18,841.6 | 7,254.5  | 6,036.9  | 18,672.6  | 31,964.0  | 50,805.7  | 400.49   | 0.99% |
| Japan              | 2060 | 43,627.5 | 10.1  | 43,637.6 | 36,508.0 | 30,459.9 | 86,941.9  | 153,909.8 | 197,547.4 | 2,009.11 | 2.18% |
| Jordan             | 2019 | 256.4    | 3.4   | 259.8    | 35.6     | 144.0    | 411.0     | 590.6     | 850.5     | 84.19    | 1.91% |
| Jordan             | 2060 | 885.3    | 7.2   | 892.5    | 84.4     | 336.0    | 7,655.6   | 8,076.0   | 8,968.5   | 658.73   | 4.50% |
| Kazakhstan         | 2019 | 289.4    | 1.5   | 290.9    | 151.6    | 491.8    | 2,557.8   | 3,201.1   | 3,492.1   | 188.24   | 1.92% |
| Kazakhstan         | 2060 | 1,711.9  | 3.3   | 1,715.2  | 355.8    | 1,157.0  | 25,470.8  | 26,983.7  | 28,698.9  | 1,136.88 | 2.86% |
| Kenya              | 2019 | 131.2    | 5.7   | 136.9    | 65.7     | 146.6    | 393.4     | 605.7     | 742.6     | 14.12    | 0.74% |
| Kenya              | 2060 | 1,852.0  | 35.4  | 1,887.4  | 349.2    | 783.9    | 7,916.0   | 9,049.1   | 10,936.5  | 106.80   | 2.07% |
| Korea, Rep.        | 2019 | 5,567.6  | 4.8   | 5,572.3  | 1,597.9  | 5,412.7  | 8,905.6   | 15,916.3  | 21,488.6  | 419.49   | 1.30% |
| Korea, Rep.        | 2060 | 23,818.4 | 7.7   | 23,826.1 | 8,031.3  | 27,077.3 | 351,587.6 | 386,696.3 | 410,522.3 | 9,613.75 | 3.41% |
| Kuwait             | 2019 | 637.5    | 0.4   | 637.9    | 150.3    | 549.0    | 957.8     | 1,657.1   | 2,295.0   | 545.50   | 1.69% |
| Kuwait             | 2060 | 1,625.3  | 0.6   | 1,625.9  | 279.2    | 998.1    | 30,425.4  | 31,702.7  | 33,328.6  | 6,093.03 | 9.42% |
| Kyrgyz Republic    | 2019 | 27.7     | 0.6   | 28.3     | 28.4     | 55.2     | 61.5      | 145.0     | 173.3     | 27.02    | 1.95% |
| Kyrgyz Republic    | 2060 | 185.1    | 1.7   | 186.8    | 499.5    | 975.6    | 784.7     | 2,259.8   | 2,446.5   | 250.28   | 7.00% |
| Lao PDR            | 2019 | 12.9     | 0.7   | 13.6     | 17.9     | 63.1     | 149.4     | 230.4     | 244.0     | 34.03    | 1.30% |
| Lao PDR            | 2060 | 253.4    | 3.3   | 256.7    | 319.4    | 1,129.0  | 3,810.5   | 5,258.9   | 5,515.6   | 568.25   | 3.48% |
| Latvia             | 2019 | 139.0    | 0.3   | 139.3    | 76.2     | 64.0     | 754.7     | 894.9     | 1,034.2   | 542.40   | 3.01% |
| Latvia             | 2060 | 307.8    | 0.3   | 308.0    | 454.0    | 382.1    | 3,312.2   | 4,148.3   | 4,456.4   | 3,218.99 | 3.08% |
| Lebanon            | 2019 | 380.2    | 1.7   | 382.0    | 87.2     | 204.8    | 539.7     | 831.7     | 1,213.6   | 177.03   | 2.34% |
| Lebanon            | 2060 | 708.5    | 2.4   | 710.9    | 124.2    | 290.9    | 7,235.8   | 7,651.0   | 8,361.9   | 1,274.07 | 4.85% |
| Lesotho            | 2019 | 10.7     | 0.3   | 11.0     | 5.7      | 9.3      | 22.1      | 37.1      | 48.1      | 22.65    | 2.05% |
| Lesotho            | 2060 | 96.5     | 0.8   | 97.3     | 17.9     | 29.2     | 142.9     | 190.1     | 287.3     | 103.53   | 4.46% |
| Libya              | 2019 | 102.3    | 0.2   | 102.5    | 12.8     | 98.2     | 483.9     | 594.9     | 697.4     | 102.90   | 1.78% |
| Libya              | 2060 | 519.4    | 0.4   | 519.8    | 30.6     | 230.6    | 9,190.3   | 9,451.6   | 9,971.4   | 1,154.51 | 6.24% |
| Lithuania          | 2019 | 243.4    | 0.4   | 243.8    | 148.0    | 124.7    | 1,179.0   | 1,451.7   | 1,695.5   | 614.39   | 3.10% |
| Lithuania          | 2060 | 598.2    | 0.4   | 598.6    | 799.4    | 674.2    | 8,142.0   | 9,615.5   | 10,214.1  | 5,187.10 | 3.57% |
| Luxembourg         | 2019 | 261.8    | 0.1   | 261.9    | 112.1    | 138.9    | 383.0     | 634.0     | 895.8     | 1,454.90 | 1.28% |
| Luxembourg         | 2060 | 642.9    | 0.2   | 643.1    | 268.1    | 323.7    | 3,301.8   | 3,893.6   | 4,536.7   | 5,477.38 | 1.61% |
| Madagascar         | 2019 | 14.9     | 2.9   | 17.8     | 36.0     | 38.8     | 56.7      | 131.6     | 149.4     | 5.54     | 1.06% |
| Madagascar         | 2060 | 223.5    | 23.4  | 246.9    | 246.0    | 266.2    | 520.6     | 1,032.8   | 1,279.7   | 19.98    | 3.00% |
| Malawi             | 2019 | 17.3     | 2.4   | 19.6     | 22.2     | 14.4     | 29.3      | 65.8      | 85.5      | 4.59     | 0.78% |
| Malawi             | 2060 | 255.0    | 19.8  | 274.7    | 148.9    | 97.7     | 376.0     | 622.5     | 897.3     | 19.91    | 1.73% |
| Malaysia           | 2019 | 772.5    | 2.9   | 775.4    | 279.6    | 1,082.1  | 3,538.9   | 4,900.6   | 5,676.0   | 177.65   | 1.55% |
| Malaysia           | 2060 | 6,227.6  | 8.1   | 6,235.7  | 3,132.7  | 12,102.9 | 83,082.2  | 98,317.7  | 104,553.5 | 2,505.36 | 3.98% |



|                    |      |          |      |          |          |          |           |           |           |           |       |
|--------------------|------|----------|------|----------|----------|----------|-----------|-----------|-----------|-----------|-------|
| Maldives           | 2019 | 20.0     | 0.1  | 20.1     | 3.3      | 13.6     | 29.0      | 45.8      | 65.9      | 124.11    | 1.18% |
| Maldives           | 2060 | 149.1    | 0.4  | 149.5    | 30.7     | 117.7    | 1,711.9   | 1,860.2   | 2,009.7   | 3,387.24  | 3.10% |
| Mali               | 2019 | 17.8     | 2.3  | 20.1     | 16.8     | 36.5     | 52.9      | 106.2     | 126.2     | 6.42      | 0.73% |
| Mali               | 2060 | 366.5    | 21.7 | 388.2    | 138.8    | 307.4    | 651.3     | 1,097.6   | 1,485.7   | 28.34     | 1.61% |
| Malta              | 2019 | 105.4    | 0.1  | 105.5    | 34.2     | 43.1     | 145.5     | 222.8     | 328.3     | 745.46    | 2.09% |
| Malta              | 2060 | 329.4    | 0.1  | 329.5    | 47.4     | 58.3     | 1,301.8   | 1,407.5   | 1,737.0   | 4,187.16  | 2.57% |
| Mauritania         | 2019 | 9.3      | 0.7  | 10.1     | 2.9      | 5.7      | 31.4      | 40.0      | 50.0      | 11.06     | 0.63% |
| Mauritania         | 2060 | 111.5    | 4.8  | 116.3    | 14.3     | 28.2     | 388.6     | 431.2     | 547.5     | 51.24     | 1.57% |
| Mauritius          | 2019 | 32.5     | 0.1  | 32.6     | 12.0     | 14.4     | 331.7     | 358.1     | 390.7     | 307.71    | 2.78% |
| Mauritius          | 2060 | 201.5    | 0.2  | 201.7    | 17.4     | 20.7     | 6,222.1   | 6,260.2   | 6,461.9   | 5,789.05  | 8.89% |
| Mexico             | 2019 | 5,305.5  | 29.7 | 5,335.1  | 1,493.5  | 1,902.5  | 14,436.7  | 17,832.6  | 23,167.8  | 181.60    | 1.83% |
| Mexico             | 2060 | 16,340.5 | 54.4 | 16,394.8 | 3,615.4  | 4,510.4  | 114,367.3 | 122,493.0 | 138,887.9 | 883.76    | 5.01% |
| Moldova            | 2019 | 47.4     | 0.7  | 48.1     | 43.6     | 34.3     | 188.6     | 266.5     | 314.7     | 77.82     | 2.63% |
| Moldova            | 2060 | 99.7     | 0.9  | 100.5    | 215.9    | 171.5    | 1,402.8   | 1,790.2   | 1,890.7   | 618.07    | 4.51% |
| Mongolia           | 2019 | 29.5     | 0.5  | 30.0     | 24.7     | 59.0     | 223.2     | 306.9     | 337.0     | 104.48    | 2.37% |
| Mongolia           | 2060 | 242.6    | 1.3  | 243.9    | 275.4    | 660.7    | 3,145.7   | 4,081.7   | 4,325.6   | 913.04    | 5.14% |
| Montenegro         | 2019 | 32.9     | 0.2  | 33.1     | 17.7     | 14.6     | 107.7     | 140.0     | 173.0     | 275.56    | 3.12% |
| Montenegro         | 2060 | 107.1    | 0.2  | 107.3    | 82.9     | 67.8     | 882.7     | 1,033.5   | 1,140.8   | 2,014.62  | 5.65% |
| Morocco            | 2019 | 445.0    | 10.2 | 455.2    | 368.4    | 532.9    | 1,804.0   | 2,705.3   | 3,160.5   | 86.66     | 2.64% |
| Morocco            | 2060 | 2,215.0  | 22.5 | 2,237.5  | 705.4    | 1,034.5  | 21,384.6  | 23,124.5  | 25,362.0  | 534.61    | 5.45% |
| Mozambique         | 2019 | 36.1     | 2.4  | 38.5     | 72.2     | 64.1     | 51.4      | 187.8     | 226.3     | 7.45      | 1.47% |
| Mozambique         | 2060 | 577.2    | 19.9 | 597.1    | 447.4    | 408.9    | 929.6     | 1,785.9   | 2,383.0   | 30.41     | 1.52% |
| Myanmar            | 2019 | 97.9     | 2.8  | 100.6    | 22.2     | 187.0    | 553.7     | 762.8     | 863.5     | 15.98     | 1.26% |
| Myanmar            | 2060 | 1,831.1  | 10.5 | 1,841.6  | 236.6    | 2,002.4  | 21,616.9  | 23,855.9  | 25,697.5  | 413.43    | 3.47% |
| Namibia            | 2019 | 45.2     | 0.3  | 45.5     | 20.7     | 19.4     | 63.5      | 103.6     | 149.1     | 59.76     | 1.19% |
| Namibia            | 2060 | 429.4    | 1.6  | 430.9    | 88.2     | 83.0     | 729.6     | 900.9     | 1,331.8   | 301.98    | 3.66% |
| Nepal              | 2019 | 40.2     | 2.3  | 42.5     | 71.8     | 91.4     | 154.2     | 317.4     | 359.9     | 12.58     | 1.05% |
| Nepal              | 2060 | 479.5    | 10.6 | 490.1    | 715.6    | 920.7    | 3,501.5   | 5,137.8   | 5,627.9   | 162.01    | 2.74% |
| Netherlands        | 2019 | 6,373.2  | 3.2  | 6,376.4  | 3,444.8  | 1,624.2  | 5,860.1   | 10,929.1  | 17,305.5  | 1,012.19  | 1.90% |
| Netherlands        | 2060 | 17,271.9 | 4.7  | 17,276.6 | 7,326.1  | 3,309.3  | 41,707.6  | 52,343.0  | 69,619.6  | 4,147.23  | 3.47% |
| New Zealand        | 2019 | 1,531.0  | 1.1  | 1,532.1  | 863.1    | 639.4    | 1,692.5   | 3,195.0   | 4,727.1   | 988.30    | 2.24% |
| New Zealand        | 2060 | 4,334.9  | 1.8  | 4,336.7  | 7,237.5  | 5,279.9  | 10,158.2  | 22,675.6  | 27,012.3  | 4,716.43  | 4.68% |
| Nicaragua          | 2019 | 76.1     | 1.5  | 77.6     | 71.8     | 83.4     | 108.1     | 263.2     | 340.9     | 52.08     | 2.70% |
| Nicaragua          | 2060 | 401.0    | 3.4  | 404.4    | 241.4    | 275.0    | 2,021.3   | 2,537.6   | 2,942.0   | 334.04    | 6.64% |
| Niger              | 2019 | 13.6     | 1.6  | 15.1     | 26.0     | 47.8     | 26.9      | 100.8     | 115.9     | 4.97      | 0.90% |
| Niger              | 2060 | 320.6    | 22.4 | 343.0    | 251.6    | 467.5    | 397.5     | 1,116.7   | 1,459.7   | 17.23     | 1.66% |
| Nigeria            | 2019 | 468.5    | 9.4  | 477.8    | 274.4    | 600.7    | 1,013.1   | 1,888.2   | 2,366.1   | 11.77     | 0.53% |
| Nigeria            | 2060 | 6,403.1  | 79.3 | 6,482.5  | 1,512.7  | 3,324.6  | 24,060.1  | 28,897.3  | 35,379.8  | 74.31     | 1.65% |
| North Macedonia    | 2019 | 55.8     | 0.5  | 56.3     | 27.0     | 32.5     | 286.1     | 345.6     | 401.9     | 192.92    | 3.19% |
| North Macedonia    | 2060 | 104.5    | 0.6  | 105.1    | 98.9     | 119.0    | 1,572.3   | 1,790.2   | 1,895.3   | 1,093.06  | 5.24% |
| Norway             | 2019 | 2,870.0  | 1.0  | 2,870.9  | 1,522.4  | 761.2    | 1,852.6   | 4,136.3   | 7,007.2   | 1,302.73  | 1.73% |
| Norway             | 2060 | 7,411.0  | 1.8  | 7,412.9  | 3,458.7  | 1,717.7  | 10,076.7  | 15,253.1  | 22,665.9  | 3,288.63  | 2.24% |
| Oman               | 2019 | 256.9    | 0.4  | 257.3    | 262.0    | 582.4    | 570.3     | 1,414.7   | 1,672.0   | 336.09    | 2.19% |
| Oman               | 2060 | 588.7    | 1.0  | 589.6    | 668.0    | 1,408.3  | 14,549.2  | 16,625.5  | 17,215.1  | 2,358.87  | 4.36% |
| Pakistan           | 2019 | 268.7    | 17.6 | 286.3    | 156.9    | 629.6    | 2,334.6   | 3,121.1   | 3,407.4   | 15.73     | 1.06% |
| Pakistan           | 2060 | 3,277.9  | 97.5 | 3,375.5  | 2,370.4  | 9,115.5  | 36,461.3  | 47,947.2  | 51,322.7  | 139.92    | 2.57% |
| Panama             | 2019 | 336.3    | 0.5  | 336.8    | 160.7    | 164.3    | 546.6     | 871.6     | 1,208.5   | 284.58    | 1.80% |
| Panama             | 2060 | 1,791.4  | 1.1  | 1,792.6  | 553.0    | 560.9    | 10,756.4  | 11,870.2  | 13,662.8  | 2,221.14  | 2.68% |
| Paraguay           | 2019 | 169.8    | 1.8  | 171.6    | 94.0     | 110.4    | 337.7     | 542.0     | 713.6     | 101.29    | 1.88% |
| Paraguay           | 2060 | 959.0    | 4.3  | 963.3    | 300.7    | 350.2    | 3,520.8   | 4,171.7   | 5,135.0   | 546.28    | 3.93% |
| Peru               | 2019 | 801.4    | 9.1  | 810.5    | 508.8    | 844.2    | 1,350.4   | 2,703.4   | 3,514.0   | 108.09    | 1.52% |
| Peru               | 2060 | 4,170.8  | 18.4 | 4,189.2  | 1,500.9  | 2,482.3  | 24,165.2  | 28,148.4  | 32,337.6  | 780.90    | 2.92% |
| Philippines        | 2019 | 509.8    | 12.2 | 522.0    | 254.0    | 777.1    | 3,509.4   | 4,540.6   | 5,062.6   | 46.83     | 1.34% |
| Philippines        | 2060 | 6,905.3  | 49.0 | 6,954.3  | 3,629.9  | 11,101.8 | 62,894.2  | 77,625.9  | 84,580.1  | 563.04    | 4.45% |
| Poland             | 2019 | 2,547.8  | 5.0  | 2,552.8  | 1,350.5  | 1,742.6  | 9,763.0   | 12,856.1  | 15,408.9  | 406.70    | 2.58% |
| Poland             | 2060 | 7,252.1  | 5.7  | 7,257.8  | 8,957.1  | 11,573.5 | 63,668.6  | 84,199.2  | 91,457.1  | 2,934.33  | 4.86% |
| Portugal           | 2019 | 1,635.2  | 1.6  | 1,636.8  | 370.8    | 306.4    | 2,104.8   | 2,782.0   | 4,418.8   | 432.11    | 1.84% |
| Portugal           | 2060 | 2,666.2  | 2.0  | 2,668.3  | 448.3    | 368.7    | 9,615.0   | 10,432.0  | 13,100.3  | 1,538.65  | 2.39% |
| Qatar              | 2019 | 419.8    | 0.2  | 420.1    | 366.1    | 893.1    | 1,020.9   | 2,280.1   | 2,700.2   | 953.43    | 1.53% |
| Qatar              | 2060 | 1,595.0  | 0.5  | 1,595.4  | 620.9    | 1,514.6  | 65,465.5  | 67,601.1  | 69,196.5  | 17,267.69 | 7.97% |
| Romania            | 2019 | 942.9    | 2.7  | 945.6    | 448.1    | 882.8    | 5,322.2   | 6,653.0   | 7,598.6   | 392.40    | 3.04% |
| Romania            | 2060 | 3,497.8  | 3.1  | 3,501.0  | 2,436.9  | 4,810.8  | 18,227.4  | 25,475.1  | 28,976.1  | 1,909.49  | 4.47% |
| Russian Federation | 2019 | 5,855.2  | 27.8 | 5,883.0  | 3,159.9  | 3,777.6  | 27,599.8  | 34,537.3  | 40,420.3  | 277.09    | 2.39% |
| Russian Federation | 2060 | 12,807.1 | 33.8 | 12,841.0 | 22,426.9 | 26,953.4 | 65,954.5  | 115,334.8 | 128,175.7 | 965.97    | 4.57% |
| Rwanda             | 2019 | 19.5     | 1.4  | 20.9     | 14.3     | 14.5     | 37.8      | 66.6      | 87.5      | 6.93      | 0.84% |
| Rwanda             | 2060 | 406.3    | 9.8  | 416.0    | 76.5     | 78.5     | 1,137.2   | 1,292.3   | 1,708.3   | 65.22     | 1.66% |
| Samoa              | 2019 | 4.1      | 0.1  | 4.2      | 1.6      | 3.6      | 14.4      | 19.6      | 23.8      | 120.58    | 2.79% |
| Samoa              | 2060 | 17.6     | 0.1  | 17.7     | 12.1     | 27.1     | 46.2      | 85.4      | 103.2     | 361.45    | 5.94% |

|                      |      |           |      |           |          |           |             |             |             |           |        |
|----------------------|------|-----------|------|-----------|----------|-----------|-------------|-------------|-------------|-----------|--------|
| Saudi Arabia         | 2019 | 4,173.3   | 1.8  | 4,175.1   | 988.5    | 3,835.6   | 10,588.2    | 15,412.3    | 19,587.4    | 571.58    | 2.44%  |
| Saudi Arabia         | 2060 | 10,213.8  | 3.4  | 10,217.1  | 1,726.5  | 6,678.4   | 131,841.3   | 140,246.1   | 150,463.3   | 3,317.91  | 5.62%  |
| Senegal              | 2019 | 24.7      | 1.8  | 26.6      | 22.1     | 47.9      | 95.9        | 165.9       | 192.4       | 11.81     | 0.82%  |
| Senegal              | 2060 | 335.5     | 13.0 | 348.4     | 116.8    | 250.1     | 1,040.9     | 1,407.8     | 1,756.2     | 44.41     | 1.34%  |
| Serbia               | 2019 | 295.7     | 2.3  | 298.0     | 117.3    | 228.2     | 1,162.2     | 1,507.7     | 1,805.7     | 205.84    | 3.51%  |
| Serbia               | 2060 | 759.1     | 2.5  | 761.6     | 266.4    | 516.8     | 8,499.1     | 9,282.4     | 10,043.9    | 1,549.43  | 4.40%  |
| Sierra Leone         | 2019 | 17.7      | 0.8  | 18.5      | 3.6      | 7.6       | 11.7        | 22.9        | 41.4        | 5.30      | 1.02%  |
| Sierra Leone         | 2060 | 222.1     | 4.5  | 226.6     | 15.0     | 31.8      | 141.3       | 188.1       | 414.6       | 28.90     | 3.13%  |
| Singapore            | 2019 | 678.2     | 0.6  | 678.8     | 493.4    | 462.0     | 1,966.1     | 2,921.5     | 3,600.3     | 620.28    | 0.96%  |
| Singapore            | 2060 | 2,644.3   | 0.9  | 2,645.3   | 2,699.0  | 2,527.5   | 50,359.9    | 55,586.3    | 58,231.6    | 9,294.64  | 2.09%  |
| Slovak Republic      | 2019 | 473.1     | 0.8  | 473.9     | 283.1    | 240.1     | 1,702.1     | 2,225.3     | 2,699.2     | 494.64    | 2.56%  |
| Slovak Republic      | 2060 | 1,230.0   | 1.1  | 1,231.1   | 1,897.9  | 1,611.9   | 14,784.8    | 18,294.6    | 19,525.7    | 4,123.31  | 4.66%  |
| Slovenia             | 2019 | 303.7     | 0.3  | 304.0     | 113.8    | 146.5     | 627.6       | 887.8       | 1,191.8     | 573.34    | 2.20%  |
| Slovenia             | 2060 | 801.0     | 0.4  | 801.4     | 317.8    | 408.7     | 4,720.4     | 5,447.0     | 6,248.4     | 3,360.52  | 3.32%  |
| South Africa         | 2019 | 1,789.0   | 13.6 | 1,802.6   | 1,217.6  | 1,566.2   | 3,033.5     | 5,817.2     | 7,619.8     | 130.12    | 1.96%  |
| South Africa         | 2060 | 8,552.3   | 35.3 | 8,587.6   | 2,923.7  | 3,739.0   | 26,742.6    | 33,405.3    | 41,992.9    | 537.19    | 4.83%  |
| Spain                | 2019 | 9,508.1   | 3.0  | 9,511.1   | 5,238.7  | 3,707.7   | 10,677.7    | 19,624.1    | 29,135.2    | 623.39    | 2.09%  |
| Spain                | 2060 | 15,675.8  | 3.5  | 15,679.3  | 8,373.8  | 5,770.8   | 50,598.8    | 64,743.3    | 80,422.6    | 1,959.33  | 2.36%  |
| Sri Lanka            | 2019 | 92.9      | 1.7  | 94.6      | 26.4     | 55.3      | 797.7       | 879.4       | 974.1       | 45.68     | 1.16%  |
| Sri Lanka            | 2060 | 918.5     | 5.4  | 923.8     | 197.8    | 417.8     | 24,217.7    | 24,833.3    | 25,757.1    | 1,228.15  | 5.90%  |
| Sweden               | 2019 | 3,838.0   | 1.5  | 3,839.4   | 1,707.8  | 879.3     | 3,916.7     | 6,503.7     | 10,343.2    | 1,030.57  | 1.94%  |
| Sweden               | 2060 | 9,908.6   | 2.3  | 9,910.9   | 2,916.8  | 1,500.6   | 17,259.7    | 21,677.1    | 31,588.0    | 2,690.79  | 2.41%  |
| Switzerland          | 2019 | 5,731.3   | 1.5  | 5,732.8   | 2,864.7  | 2,261.7   | 4,007.6     | 9,134.0     | 14,866.8    | 1,730.44  | 2.03%  |
| Switzerland          | 2060 | 15,167.0  | 2.5  | 15,169.6  | 5,106.3  | 3,921.5   | 20,764.8    | 29,792.6    | 44,962.2    | 4,491.05  | 3.13%  |
| Tajikistan           | 2019 | 23.7      | 0.8  | 24.4      | 17.1     | 21.1      | 57.8        | 95.9        | 120.4       | 12.91     | 1.45%  |
| Tajikistan           | 2060 | 233.0     | 3.0  | 236.1     | 336.3    | 412.3     | 1,588.7     | 2,337.3     | 2,573.4     | 139.58    | 3.15%  |
| Tanzania             | 2019 | 61.2      | 5.2  | 66.4      | 115.0    | 214.1     | 234.2       | 563.4       | 629.7       | 10.86     | 1.03%  |
| Tanzania             | 2060 | 1,264.1   | 47.6 | 1,311.7   | 806.2    | 1,516.0   | 2,989.3     | 5,311.5     | 6,623.2     | 41.69     | 1.38%  |
| Thailand             | 2019 | 905.7     | 9.4  | 915.1     | 347.7    | 1,202.1   | 5,803.9     | 7,353.7     | 8,268.8     | 118.76    | 1.52%  |
| Thailand             | 2060 | 5,583.6   | 21.2 | 5,604.7   | 2,315.3  | 8,006.4   | 164,852.3   | 175,174.0   | 180,778.7   | 2,930.36  | 6.36%  |
| Timor-Leste          | 2019 | 3.3       | 0.1  | 3.5       | 3.8      | 9.6       | 3.7         | 17.1        | 20.6        | 15.93     | 1.21%  |
| Timor-Leste          | 2060 | 50.8      | 0.8  | 51.7      | 89.6     | 228.1     | 47.0        | 364.6       | 416.3       | 188.99    | 8.56%  |
| Togo                 | 2019 | 9.1       | 0.6  | 9.7       | 17.8     | 15.3      | 30.4        | 63.4        | 73.1        | 9.04      | 1.01%  |
| Togo                 | 2060 | 113.6     | 4.2  | 117.8     | 106.1    | 91.2      | 314.4       | 511.8       | 629.6       | 34.92     | 1.97%  |
| Tonga                | 2019 | 2.5       | 0.0  | 2.6       | 1.8      | 3.1       | 6.3         | 11.3        | 13.8        | 132.39    | 2.70%  |
| Tonga                | 2060 | 10.2      | 0.1  | 10.3      | 10.9     | 19.0      | 22.2        | 52.0        | 62.3        | 444.02    | 5.28%  |
| Trinidad and Tobago  | 2019 | 91.6      | 0.1  | 91.8      | 25.2     | 47.8      | 507.1       | 580.2       | 672.0       | 481.71    | 2.81%  |
| Trinidad and Tobago  | 2060 | 259.8     | 0.2  | 260.0     | 54.7     | 103.0     | 4,491.3     | 4,649.0     | 4,908.9     | 3,856.03  | 10.20% |
| Tunisia              | 2019 | 203.4     | 2.1  | 205.5     | 111.3    | 238.8     | 454.3       | 804.4       | 1,009.9     | 86.35     | 2.42%  |
| Tunisia              | 2060 | 718.0     | 4.1  | 722.1     | 186.0    | 400.6     | 6,033.1     | 6,619.7     | 7,341.8     | 525.76    | 5.33%  |
| Turkey               | 2019 | 2,526.4   | 19.1 | 2,545.5   | 546.9    | 2,007.0   | 9,536.6     | 12,090.5    | 14,636.0    | 175.43    | 1.92%  |
| Turkey               | 2060 | 11,841.1  | 34.4 | 11,875.5  | 874.8    | 3,206.4   | 116,570.9   | 120,652.1   | 132,527.6   | 1,353.14  | 3.18%  |
| Turkmenistan         | 2019 | 167.5     | 0.3  | 167.8     | 102.3    | 125.7     | 776.7       | 1,004.7     | 1,172.5     | 197.32    | 2.21%  |
| Turkmenistan         | 2060 | 1,950.4   | 0.8  | 1,951.2   | 1,570.7  | 1,933.8   | 16,679.5    | 20,184.0    | 22,135.2    | 2,674.34  | 5.17%  |
| Uganda               | 2019 | 45.0      | 3.5  | 48.5      | 19.5     | 37.0      | 91.6        | 148.1       | 196.6       | 4.44      | 0.52%  |
| Uganda               | 2060 | 683.4     | 28.4 | 711.8     | 143.1    | 271.4     | 2,056.9     | 2,471.4     | 3,183.2     | 30.75     | 0.93%  |
| Ukraine              | 2019 | 789.1     | 12.5 | 801.6     | 236.7    | 797.7     | 3,788.5     | 4,822.9     | 5,624.6     | 127.85    | 3.66%  |
| Ukraine              | 2060 | 1,261.5   | 12.7 | 1,274.2   | 1,251.5  | 4,234.5   | 14,080.0    | 19,565.9    | 20,840.1    | 642.75    | 5.69%  |
| United Arab Emirates | 2019 | 1,404.0   | 0.9  | 1,404.9   | 605.4    | 2,287.3   | 7,370.3     | 10,263.0    | 11,667.9    | 1,194.19  | 2.80%  |
| United Arab Emirates | 2060 | 2,227.6   | 1.3  | 2,228.9   | 932.6    | 3,347.6   | 172,781.7   | 177,061.9   | 179,290.8   | 16,873.63 | 11.04% |
| United Kingdom       | 2019 | 21,857.8  | 26.0 | 21,883.8  | 6,637.2  | 9,062.6   | 22,546.5    | 38,246.4    | 60,130.2    | 890.42    | 2.09%  |
| United Kingdom       | 2060 | 53,230.8  | 40.4 | 53,271.2  | 12,843.8 | 17,273.2  | 78,628.1    | 108,745.1   | 162,016.3   | 2,158.48  | 2.41%  |
| United States        | 2019 | 304,210.5 | 33.3 | 304,243.8 | 12,523.3 | 99,954.4  | 288,994.6   | 401,472.4   | 705,716.2   | 2,144.61  | 3.30%  |
| United States        | 2060 | 831,947.9 | 53.8 | 832,001.7 | 21,697.2 | 172,118.7 | 1,596,651.3 | 1,790,467.1 | 2,622,468.9 | 6,698.60  | 4.62%  |
| Uruguay              | 2019 | 389.5     | 0.9  | 390.4     | 143.2    | 89.4      | 552.8       | 785.4       | 1,175.8     | 339.65    | 1.92%  |
| Uruguay              | 2060 | 1,042.7   | 1.3  | 1,043.9   | 273.9    | 169.1     | 2,070.0     | 2,513.0     | 3,557.0     | 984.60    | 2.41%  |
| Uzbekistan           | 2019 | 149.7     | 2.9  | 152.6     | 223.8    | 277.9     | 1,120.7     | 1,622.5     | 1,775.1     | 53.82     | 2.96%  |
| Uzbekistan           | 2060 | 924.6     | 7.2  | 931.9     | 3,225.2  | 4,018.1   | 13,428.2    | 20,671.5    | 21,603.4    | 490.06    | 4.71%  |
| Vanuatu              | 2019 | 2.0       | 0.1  | 2.1       | 5.3      | 8.2       | 12.7        | 26.3        | 28.4        | 94.55     | 3.03%  |
| Vanuatu              | 2060 | 16.7      | 0.4  | 17.1      | 93.0     | 144.5     | 52.6        | 290.0       | 307.1       | 474.53    | 12.06% |
| Vietnam              | 2019 | 339.0     | 6.4  | 345.4     | 249.4    | 521.8     | 2,570.2     | 3,341.4     | 3,686.8     | 38.22     | 1.12%  |
| Vietnam              | 2060 | 5,562.9   | 26.9 | 5,589.8   | 3,319.2  | 6,978.4   | 87,209.4    | 97,507.1    | 103,096.9   | 942.70    | 2.81%  |
| West Bank and Gaza   | 2019 | 122.8     | 2.1  | 124.9     | 74.7     | 474.7     | 364.2       | 913.6       | 1,038.5     | 208.47    | 1.70%  |



|                    |      |       |      |       |       |         |         |         |         |        |       |
|--------------------|------|-------|------|-------|-------|---------|---------|---------|---------|--------|-------|
| West Bank and Gaza | 2060 | 816.0 | 6.7  | 822.6 | 233.5 | 1,479.3 | 4,351.5 | 6,064.3 | 6,886.9 | 694.70 | 2.77% |
| Zambia             | 2019 | 32.2  | 2.5  | 34.7  | 36.5  | 72.9    | 91.2    | 200.7   | 235.4   | 13.18  | 1.01% |
| Zambia             | 2060 | 450.3 | 18.7 | 468.9 | 232.4 | 464.2   | 730.1   | 1,426.7 | 1,895.6 | 39.92  | 1.53% |
| Zimbabwe           | 2019 | 44.6  | 2.5  | 47.1  | 52.9  | 157.6   | 84.1    | 294.7   | 341.8   | 23.34  | 1.77% |
| Zimbabwe           | 2060 | 346.4 | 11.5 | 357.9 | 213.6 | 652.9   | 653.6   | 1,520.1 | 1,878.0 | 70.93  | 5.23% |

### Appendix 3: Systematic literature review for absenteeism, presenteeism, hospitalization, and outpatient visits

A systematic literature review was conducted for absenteeism, presenteeism, and hospitalizations to identify studies that assessed the additional number of each measure experienced by people with overweight and obesity. Only articles that were published in the last 10 years (Dec 2011 – Dec 2021) in English were included in this review. Databases included in the search were PubMed and Web of Science. Duplicates were reconciled using the systematic review tool, Rayyan, leaving 4,680 hospitalization/outpatient articles and 429 absenteeism/presenteeism articles for full abstract screening to assess inclusion/exclusion criteria. Two independent reviewers screened all articles and identified 37 hospitalization/outpatient articles and 85 absenteeism/presenteeism articles for full-text screening. Articles were excluded if they were comments, editorials, conference proceedings, or protocols. They were also excluded if they focused on specific sub-populations rather than the general population. Full-text scanning resulted in 18 hospitalization and 29 absenteeism/presenteeism articles.

#### Absenteeism and presenteeism

Absenteeism was measured by additional days missed at work and presenteeism was measured by additional percent presenteeism at work experienced by people with overweight and obesity. In the literature review, 10 articles for absenteeism and 5 articles for presenteeism were identified with comparable measurements. For the seven countries for which estimates were available, the point estimate for those countries was applied. When a country had multiple estimates, the average of the point estimates was applied. For all remaining countries, the point estimates from all studies were used to calculate the interquartile range (IQ). The International Trade Union Confederation (ITUC) Global Rights Index was used to identify labor laws on a scale of 1-6 with 1 representing the best labor laws or sporadic violations of rights and 6 representing the worst labor laws or no guarantee of rights due to the breakdown of the rule of law. It was assumed that countries with the best labor laws (1) would have the most absenteeism and least presenteeism while countries with the worst labor laws (6) would have the least absenteeism and most presenteeism. Therefore, we divided the absenteeism and presenteeism IQs by 5 to create 6 categories. Countries with a ITUC ranking of 1 were assigned the highest absenteeism category, Q3, and the lowest presenteeism category, Q1. This application was continued until the countries with an ITUC ranking of 6 were assigned the lowest absenteeism category, Q1, and the highest presenteeism category, Q3.

#### Prisma Flowchart for Absenteeism and Presenteeism

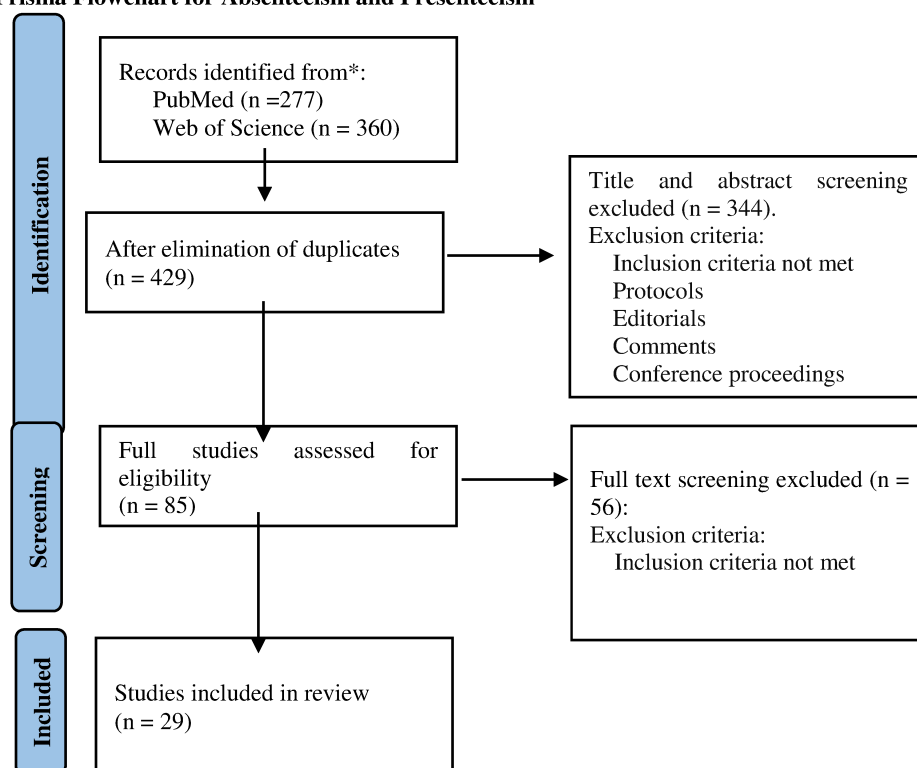

### Hospitalization, length of stay, and outpatient visits

Additional number of primary care/general practitioner/outpatient visits and additional number of hospitalizations experienced by people with overweight and obesity per year each had 12 and 7 articles respectively with comparable measurements for each measure, of which 10 and 7 were statistically significant. Therefore, country-specific data were used where available. For countries with multiple estimates available, the average of the point estimates was used. The one study from a LMIC, Brazil, was used to represent all LMICs in the model. For all HICs without country-specific evidence, the average of the point estimates from all HIC studies were applied. Additional length of stay (days) experienced by people with overweight and obesity had five articles. From these five articles four were not statistically significant and ranged from -2.39 to 1.37. The one article that was statistically significant had a point estimate near the null, 0.16 additional days. Considering the lack of available data, additional length of stay was not included in the model.

### Prisma Flowchart for Hospitalization and Length of Stay

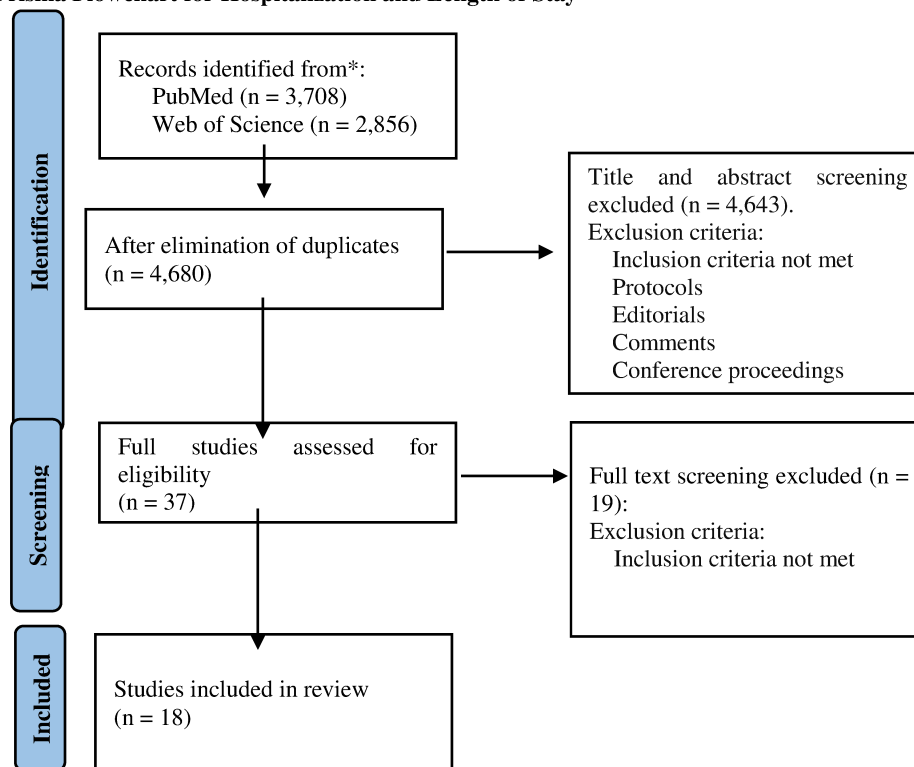

Supplement: bmjgh-2022-009773supp001_data_supplement.pdf [file bmjgh-2022-009773supp001_data_supplement.pdf]
